# Supplementary material
Source: publisher figshare collection journal article supplement (https://brill.figshare.com/ndownloader/files/35288122)
Supplement: Supplementary file 1 [file 35288122]

Language,Reference,Input,Output,Environment,Elaboration outcome: Labiodental,Elaboration outcome: Palato-alveolar,Elaboration outcome: Retroflex,Elaboration outcome: Uvular,Elaboration outcome: Pharyngeal,Elaboration outcome: Palatalization,Elaboration outcome: Labialization,Elaboration outcome: Pharyngealization,Elaboration outcome: Velarization,Elaboration outcome: Prenasalization,Elaboration outcome: Nasal release,Elaboration outcome: Lateral release,Elaboration outcome: Ejective,Elaboration outcome: Implosive,Elaboration outcome: Click,Elaboration outcome: Breathy voice,Elaboration outcome: Creaky voice,Elaboration outcome: Voiced fricative or affricate,Elaboration outcome: voiceless sonorant,Elaboration outcome: Pre-aspiration,Elaboration outcome: Post-aspiration,Basic outcome: voiceless stops /p t k/,Basic outcome: voiced stops /b d g/,Basic outcome: nasals /m n ŋ/,Basic outcome: /tʃ/,Basic outcome: /f/,Basic outcome: /s/,Basic outcome: /ʔ/,Basic outcome: /h/,Basic outcome: /r/,Basic outcome: /l/,Basic outcome: /j/,Basic outcome: /w/,Process changing voiceless stops /p t k/,Process changing voiced stops /b d g/,Process changing nasals /m n ŋ/
Alyawarra,Yallop 1977: 17,"p, t, k","b, d, ɡ",/nasal; lateral/ _ V,N,N,N,N,N,N,N,N,N,N,N,N,N,N,N,N,N,N,N,N,N,N,Y,N,N,N,N,N,N,N,N,N,N,Y,N,N
Alyawarra,Yallop 1977: 17,"p, t̪, t, ʈ, c, k","pʰ, t̪ʰ, tʰ, ʈʰ, cʰ, kʰ (slightly aspirated)",$ _ in stressed syllable,N,N,N,N,N,N,N,N,N,N,N,N,N,N,N,N,N,N,N,N,Y,N,N,N,N,N,N,N,N,N,N,N,N,Y,N,N
Alyawarra,Yallop 1977: 19,l,ɮ,/ij; aj/ _ C,N,N,N,N,N,N,N,N,N,N,N,N,N,N,N,N,N,Y,N,N,N,N,N,N,N,N,N,N,N,N,N,N,N,N,N,N
Alyawarra,Yallop 1977: 25,i; u,"(j)ɪ, jə; wu, wə",# _,N,N,N,N,N,N,N,N,N,N,N,N,N,N,N,N,N,N,N,N,N,N,N,N,N,N,N,N,N,N,N,Y,N,N,N,N
Apinayé,Cunha de Oliveira 2005,ŋ,ŋɡ (stop contour),_ oral V,N,N,N,N,N,N,N,N,N,N,N,N,N,N,N,N,N,N,N,N,N,N,N,N,N,N,N,N,N,N,N,N,N,N,N,Y
Apinayé,Cunha de Oliveira 2005: 43-52,"p, t, k, tʃ","b, d, ɡ, dʒ~dʑ",_ #,N,N,N,N,N,N,N,N,N,N,N,N,N,N,N,N,N,Y,N,N,N,N,Y,N,N,N,N,N,N,N,N,N,N,Y,N,N
Apinayé,Cunha de Oliveira 2005: 43-52,"p, t, k, tʃ","b, d, ɡ, dʒ~dʑ",$ _ (onset of unstressed syllable),N,N,N,N,N,N,N,N,N,N,N,N,N,N,N,N,N,Y,N,N,N,N,Y,N,N,N,N,N,N,N,N,N,N,Y,N,N
Apinayé,Cunha de Oliveira 2005: 46,∅,m,nasal V _ p $,N,N,N,N,N,N,N,N,N,N,N,N,N,N,N,N,N,N,N,N,N,N,N,Y,N,N,N,N,N,N,N,N,N,N,N,N
Apinayé,Cunha de Oliveira 2005: 48,t,ɾ,e _; _ e (adjacent to coronal vowels),N,N,N,N,N,N,N,N,N,N,N,N,N,N,N,N,N,N,N,N,N,N,N,N,N,N,N,N,N,Y,N,N,N,Y,N,N
Apinayé,Cunha de Oliveira 2005: 48,t,ʈ~ɖ,_ /o; u/,N,N,Y,N,N,N,N,N,N,N,N,N,N,N,N,N,N,N,N,N,N,N,N,N,N,N,N,N,N,N,N,N,N,Y,N,N
Apinayé,Cunha de Oliveira 2005: 48,t,t̪,_ i,N,N,N,N,N,N,N,N,N,N,N,N,N,N,N,N,N,N,N,N,N,N,N,N,N,N,N,N,N,N,N,N,N,Y,N,N
Apinayé,Cunha de Oliveira 2005: 50,k,kʲ,_ /i; e/,N,N,N,N,N,Y,N,N,N,N,N,N,N,N,N,N,N,N,N,N,N,N,N,N,N,N,N,N,N,N,N,N,N,Y,N,N
Apinayé,Cunha de Oliveira 2005: 55,m,b,/ə; o/ _; _ /ə; o/,N,N,N,N,N,N,N,N,N,N,N,N,N,N,N,N,N,N,N,N,N,N,Y,N,N,N,N,N,N,N,N,N,N,N,N,Y
Apinayé,Cunha de Oliveira 2005: 57,ɾ,ɽ~ɭ,_ #,N,N,Y,N,N,N,N,N,N,N,N,N,N,N,N,N,N,N,N,N,N,N,N,N,N,N,N,N,N,N,N,N,N,N,N,N
Apinayé,Cunha de Oliveira 2005: 57,ɾ,ɽ,$ _ word medially,N,N,Y,N,N,N,N,N,N,N,N,N,N,N,N,N,N,N,N,N,N,N,N,N,N,N,N,N,N,N,N,N,N,N,N,N
Apinayé,Cunha de Oliveira 2005: 58,j,dʒ,_ ##V,N,Y,N,N,N,N,N,N,N,N,N,N,N,N,N,N,N,Y,N,N,N,N,N,N,N,N,N,N,N,N,N,N,N,N,N,N
Apinayé,Cunha de Oliveira 2005: 58,j,ʑ,$ _ V in stressed syllables,N,N,N,N,N,N,N,N,N,N,N,N,N,N,N,N,N,Y,N,N,N,N,N,N,N,N,N,N,N,N,N,N,N,N,N,N
Apinayé,Cunha de Oliveira 2005: 58,j,z,$ C _ V (in second position in complex syllable onsets),N,N,N,N,N,N,N,N,N,N,N,N,N,N,N,N,N,Y,N,N,N,N,N,N,N,N,N,N,N,N,N,N,N,N,N,N
Apinayé,Cunha de Oliveira 2005: 59,w,v,$ (C) _,Y,N,N,N,N,N,N,N,N,N,N,N,N,N,N,N,N,Y,N,N,N,N,N,N,N,N,N,N,N,N,N,N,N,N,N,N
Apinayé,Cunha de Oliveira 2005: 59,w,ʋ,_ $ word-medially,Y,N,N,N,N,N,N,N,N,N,N,N,N,N,N,N,N,N,N,N,N,N,N,N,N,N,N,N,N,N,N,N,N,N,N,N
Apinayé,Cunha de Oliveira 2005: 59,w,ʋ,$ C _ V (in second position in complex syllable onsets,Y,N,N,N,N,N,N,N,N,N,N,N,N,N,N,N,N,N,N,N,N,N,N,N,N,N,N,N,N,N,N,N,N,N,N,N
Apinayé,Cunha de Oliveira 2005: 73,ɾ,ɾ̃~n,_ nasal V; nasal V _ (in same syllable as nasal V),N,N,N,N,N,N,N,N,N,N,N,N,N,N,N,N,N,N,N,N,N,N,N,Y,N,N,N,N,N,N,N,N,N,N,N,N
Apinayé,Cunha de Oliveira 2005: 75-76,t,ɾ,_ t,N,N,N,N,N,N,N,N,N,N,N,N,N,N,N,N,N,N,N,N,N,N,N,N,N,N,N,N,N,Y,N,N,N,Y,N,N
Apinayé,Cunha de Oliveira 2005: 78,∅,h,V $ _ voiceless obstruent (when second syllable is stressed),N,N,N,N,N,N,N,N,N,N,N,N,N,N,N,N,N,N,N,N,N,N,N,N,N,N,N,N,Y,N,N,N,N,N,N,N
Awngi,Hetzron 1969: 4,b,β,V _ /V; #/,N,N,N,N,N,N,N,N,N,N,N,N,N,N,N,N,N,Y,N,N,N,N,N,N,N,N,N,N,N,N,N,N,N,N,Y,N
Awngi,Hetzron 1969: 5,C,Cʷ,_ o,N,N,N,N,N,N,Y,N,N,N,N,N,N,N,N,N,N,N,N,N,N,N,N,N,N,N,N,N,N,N,N,N,N,Y,Y,Y
Awngi,Hetzron 1969: 5,C,Cʲ,_ /i; e; æ/,N,N,N,N,N,Y,N,N,N,N,N,N,N,N,N,N,N,N,N,N,N,N,N,N,N,N,N,N,N,N,N,N,N,Y,Y,Y
Awngi,Hetzron 1969: 5,o,wa,freely,N,N,N,N,N,N,N,N,N,N,N,N,N,N,N,N,N,N,N,N,N,N,N,N,N,N,N,N,N,N,N,N,Y,N,N,N
Awngi,Sharpe 1972: 15,"nd, t, n","ɳɖ, ʈ, ɳ",retroflex C _,N,N,Y,N,N,N,N,N,N,N,N,N,N,N,N,N,N,N,N,N,N,N,N,N,N,N,N,N,N,N,N,N,N,Y,N,Y
Awngi,Sharpe 1972: 15,"ŋɡ, k, ŋ","ɲɟ, c, ɲ",/i; e/ _,N,N,N,N,N,N,N,N,N,N,N,N,N,N,N,N,N,N,N,N,N,N,N,N,N,N,N,N,N,N,N,N,N,Y,N,Y
Awngi,Sharpe 1972: 15,"ŋɡ, k, ŋ","ɲɟ, c, ɲ",/n̠d̠; t̠; n̠; l̠/ _; _ /n̠d̠; t̠; n̠; l̠/ (contiguous to alveopalatal Cs),N,N,N,N,N,N,N,N,N,N,N,N,N,N,N,N,N,N,N,N,N,N,N,N,N,N,N,N,N,N,N,N,N,Y,N,Y
Awngi,Sharpe 1972: 15,"n, l","ɾn, ɾl (flap onset)",_ $,N,N,N,N,N,N,N,N,N,N,N,N,N,N,N,N,N,N,N,N,N,N,N,N,N,N,N,N,N,Y,N,N,N,N,N,Y
Awngi,Sharpe 1972: 15,"p, t, k","b, d, ɡ",# _,N,N,N,N,N,N,N,N,N,N,N,N,N,N,N,N,N,N,N,N,N,N,Y,N,N,N,N,N,N,N,N,N,N,Y,N,N
Awngi,Sharpe 1972: 15,"p, t, k","b, d, ɡ","word-medially, including /nasal C/ _",N,N,N,N,N,N,N,N,N,N,N,N,N,N,N,N,N,N,N,N,N,N,Y,N,N,N,N,N,N,N,N,N,N,Y,N,N
Awngi,Sharpe 1972: 15,"p, t, ʈ, t̠, k","pʰ, tʰ, ʈʰ, t̠ʰ, kʰ", _# in a stressed word,N,N,N,N,N,N,N,N,N,N,N,N,N,N,N,N,N,N,N,N,Y,N,N,N,N,N,N,N,N,N,N,N,N,Y,N,N
Awngi,"Sharpe 1972: 46, 41","nd, t, n","ɳɖ, ʈ, ɳ",V # # _,N,N,Y,N,N,N,N,N,N,N,N,N,N,N,N,N,N,N,N,N,N,N,N,N,N,N,N,N,N,N,N,N,N,Y,N,Y
Awngi,Sharpe 1972: 47,"ɳɖ, ʈ, ɳ","nd, t, n",alveopalatal C Vi _ Vi (between identical vowels following an alveopalatal C),N,N,N,N,N,N,N,N,N,N,N,N,N,N,N,N,N,N,N,N,N,Y,N,Y,N,N,N,N,N,N,N,N,N,N,N,N
Baining,Parker and Parker 1974: 13,"p, k","β, ɣ",V _ V,N,N,N,N,N,N,N,N,N,N,N,N,N,N,N,N,N,Y,N,N,N,N,N,N,N,N,N,N,N,N,N,N,N,Y,N,N
Baining,Parker and Parker 1974: 14,"p, t, k","b, d, ɡ",/m; n/ (#) _,N,N,N,N,N,N,N,N,N,N,N,N,N,N,N,N,N,N,N,N,N,N,Y,N,N,N,N,N,N,N,N,N,N,Y,N,N
Baining,Parker and Parker 1974: 15,t,ɾ,V _ V,N,N,N,N,N,N,N,N,N,N,N,N,N,N,N,N,N,N,N,N,N,N,N,N,N,N,N,N,N,Y,N,N,N,Y,N,N
Baining,Parker and Parker 1974: 16,"k, ɡ, ŋ","tʲ, dʲ, nʲ",_ i,N,N,N,N,N,Y,N,N,N,N,N,N,N,N,N,N,N,N,N,N,N,N,N,N,N,N,N,N,N,N,N,N,N,Y,Y,Y
Baining,Parker and Parker 1974: 16,k,j,/a; i/(#) _ i,N,N,N,N,N,N,N,N,N,N,N,N,N,N,N,N,N,N,N,N,N,N,N,N,N,N,N,N,N,N,N,Y,N,Y,N,N
Baining,Parker and Parker 1974: 18,s,h,(all),N,N,N,N,N,N,N,N,N,N,N,N,N,N,N,N,N,N,N,N,N,N,N,N,N,N,N,N,Y,N,N,N,N,N,N,N
Baining,Parker and Parker 1974: 19,l,ɭ̩,word-medially as syllable nucleus,N,N,Y,N,N,N,N,N,N,N,N,N,N,N,N,N,N,N,N,N,N,N,N,N,N,N,N,N,N,N,N,N,N,N,N,N
Balochi,Barker and Mengal 1969: xxxii,h,ɦ,V _ V,N,N,N,N,N,N,N,N,N,N,N,N,N,N,N,Y,N,N,N,N,N,N,N,N,N,N,N,N,N,N,N,N,N,N,N,N
Balochi,Barker and Mengal 1969: xxxiv,"p, t, k","pʰ, tʰ, kʰ",_ #,N,N,N,N,N,N,N,N,N,N,N,N,N,N,N,N,N,N,N,N,Y,N,N,N,N,N,N,N,N,N,N,N,N,Y,N,N
Balochi,Barker and Mengal 1969: xxxiv,k,k̟ (fronted),_ front V,N,N,N,N,N,N,N,N,N,N,N,N,N,N,N,N,N,N,N,N,N,N,N,N,N,N,N,N,N,N,N,N,N,Y,N,N
Balochi,Barker and Mengal 1969: xxxv,n,ŋ,V _ /ɡ; k/,N,N,N,N,N,N,N,N,N,N,N,N,N,N,N,N,N,N,N,N,N,N,N,Y,N,N,N,N,N,N,N,N,N,N,N,Y
Balochi,Barker and Mengal 1969: xxxv,n,ɳ,V _ /ʈ; ɖ/,N,N,Y,N,N,N,N,N,N,N,N,N,N,N,N,N,N,N,N,N,N,N,N,N,N,N,N,N,N,N,N,N,N,N,N,Y
Balochi,Barker and Mengal 1969: xxxv,n,ɲ,V _ /ʧ; ʤ/,N,N,N,N,N,N,N,N,N,N,N,N,N,N,N,N,N,N,N,N,N,N,N,N,N,N,N,N,N,N,N,N,N,N,N,Y
Bari,Spagnolo 1933: 5,dʲ,dʒ~ʒ,often,N,Y,N,N,N,N,N,N,N,N,N,N,N,N,N,N,N,Y,N,N,N,N,N,N,N,N,N,N,N,N,N,N,N,N,N,N
Bari,Spagnolo 1933: 6,p,f,dialectal,Y,N,N,N,N,N,N,N,N,N,N,N,N,N,N,N,N,N,N,N,N,N,N,N,N,Y,N,N,N,N,N,N,N,Y,N,N
Bari,Spagnolo 1933: 6,k,ŋ,_ # nasal segment,N,N,N,N,N,N,N,N,N,N,N,N,N,N,N,N,N,N,N,N,N,N,N,Y,N,N,N,N,N,N,N,N,N,Y,N,N
Bari,Spagnolo 1933: 6,"p, t, k","b, d, ɡ",_ # voiced segment,N,N,N,N,N,N,N,N,N,N,N,N,N,N,N,N,N,N,N,N,N,N,Y,N,N,N,N,N,N,N,N,N,N,Y,N,N
Bari,Spagnolo 1933: 6,"bʔ, dʔ",ʔ,"freely, becoming more common",N,N,N,N,N,N,N,N,N,N,N,N,N,N,N,N,N,N,N,N,N,N,N,N,N,N,N,Y,N,N,N,N,N,N,N,N
Basque,Saltarelli et al. 1988: 266,"b, d, ɡ","β, ð, ɣ",/V; r; ɾ/ _ V,N,N,N,N,N,N,N,N,N,N,N,N,N,N,N,N,N,Y,N,N,N,N,N,N,N,N,N,N,N,N,N,N,N,N,Y,N
Basque,Saltarelli et al. 1988: 267,d,ɟ,/nasal; lateral/ _ front V,N,N,N,N,N,N,N,N,N,N,N,N,N,N,N,N,N,N,N,N,N,N,N,N,N,N,N,N,N,N,N,N,N,N,Y,N
Basque,Saltarelli et al. 1988: 267,"p, t, k","b, d, ɡ",/nasal; liquid/ _,N,N,N,N,N,N,N,N,N,N,N,N,N,N,N,N,N,N,N,N,N,N,Y,N,N,N,N,N,N,N,N,N,N,Y,N,N
Basque,Saltarelli et al. 1988: 272,"s, s̺","z, ʐ",voiced C _,N,N,N,N,N,N,N,N,N,N,N,N,N,N,N,N,N,Y,N,N,N,N,N,N,N,N,N,N,N,N,N,N,N,N,N,N
Basque,Saltarelli et al. 1988: 273,"m, n, ɲ",m; n; ŋ (nasal C with place of C2),_ C2,N,N,N,N,N,N,N,N,N,N,N,N,N,N,N,N,N,N,N,N,N,N,N,Y,N,N,N,N,N,N,N,N,N,N,N,Y
Basque,Saltarelli et al. 1988: 275,h,ɦ,V _ V,N,N,N,N,N,N,N,N,N,N,N,N,N,N,N,Y,N,N,N,N,N,N,N,N,N,N,N,N,N,N,N,N,N,N,N,N
Basque,Saltarelli et al. 1988: 276,∅,w,u _ V,N,N,N,N,N,N,N,N,N,N,N,N,N,N,N,N,N,N,N,N,N,N,N,N,N,N,N,N,N,N,N,N,Y,N,N,N
Basque,Saltarelli et al. 1988: 276,∅,j,i _ V,N,N,N,N,N,N,N,N,N,N,N,N,N,N,N,N,N,N,N,N,N,N,N,N,N,N,N,N,N,N,N,Y,N,N,N,N
Basque,Saltarelli et al. 1988: 282,"t, d, t͡s̪̪, t͡s, t͡ʃ, s̪, s, n̪, l, ɾ, r","tʲ, dʲ, t͡s̪̪ʲ, t͡sʲ, t͡ʃʲ, s̪ʲ, sʲ, ɲ, ʎ, ɾʲ, rʲ",when Cʲ is in same or adjacent syllable (where C is in same category),N,N,N,N,N,Y,N,N,N,N,N,N,N,N,N,N,N,N,N,N,N,N,N,N,N,N,N,N,N,N,N,N,N,Y,Y,Y
Buriat,Poppe 1960: 10,"b, d, ɡ, r","p, t, k, r̥",_ /voiceless or fortis C/; _ #,N,N,N,N,N,N,N,N,N,N,N,N,N,N,N,N,N,N,Y,N,N,Y,N,N,N,N,N,N,N,N,N,N,N,N,Y,N
Buriat,Poppe 1960: 11,ɡ,ɣ,back V _ back V,N,N,N,N,N,N,N,N,N,N,N,N,N,N,N,N,N,Y,N,N,N,N,N,N,N,N,N,N,N,N,N,N,N,N,Y,N
Buriat,Poppe 1960: 12,n,ŋ,_ /velar C/,N,N,N,N,N,N,N,N,N,N,N,N,N,N,N,N,N,N,N,N,N,N,N,Y,N,N,N,N,N,N,N,N,N,N,N,Y
Buriat,Poppe 1960: 12,n,ŋ,_ #,N,N,N,N,N,N,N,N,N,N,N,N,N,N,N,N,N,N,N,N,N,N,N,Y,N,N,N,N,N,N,N,N,N,N,N,Y
Buriat,Poppe 1960: 25,"b, d, ɡ","p, t, k",_ /t; s; ʃ; x/,N,N,N,N,N,N,N,N,N,N,N,N,N,N,N,N,N,N,N,N,N,Y,N,N,N,N,N,N,N,N,N,N,N,N,Y,N
Buriat,Poppe 1960: 26,d,ʃ,_ ʃ,N,Y,N,N,N,N,N,N,N,N,N,N,N,N,N,N,N,N,N,N,N,N,N,N,N,N,N,N,N,N,N,N,N,N,Y,N
Cantonese,Matthews and Yip 1996: 14,"tsʰ, ts, s","tʃʰ, tʃ, ʃ",_ y(ː),N,Y,N,N,N,N,N,N,N,N,N,N,N,N,N,N,N,N,N,N,N,N,N,N,Y,N,N,N,N,N,N,N,N,N,N,N
Cantonese,Matthews and Yip 1996: 14,"kʷ, kʷʰ","k, kʰ",_ /u; o/,N,N,N,N,N,N,N,N,N,N,N,N,N,N,N,N,N,N,N,N,N,Y,Y,N,N,N,N,N,N,N,N,N,N,N,N,N
Cantonese,Matthews and Yip 1996: 15,k,t,"_ #, especially prevalent in younger speakers",N,N,N,N,N,N,N,N,N,N,N,N,N,N,N,N,N,N,N,N,N,Y,N,N,N,N,N,N,N,N,N,N,N,Y,N,N
Cantonese,Matthews and Yip 1996: 16,n,l,# _ by younger speakers,N,N,N,N,N,N,N,N,N,N,N,N,N,N,N,N,N,N,N,N,N,N,N,N,N,N,N,N,N,N,Y,N,N,N,N,Y
Cantonese,Matthews and Yip 1996: 16,ŋ,ʔ,"younger speakers, casual speech",N,N,N,N,N,N,N,N,N,N,N,N,N,N,N,N,N,N,N,N,N,N,N,N,N,N,N,Y,N,N,N,N,N,N,N,Y
Car Nicobarese,Braine 1970: 42,"k, ŋ","q, ɴ (“back/post velar”)",ɔ _ ($),N,N,N,Y,N,N,N,N,N,N,N,N,N,N,N,N,N,N,N,N,N,N,N,N,N,N,N,N,N,N,N,N,N,Y,N,Y
Car Nicobarese,Braine 1970: 42,"p, t, c, k","pʰ, tʰ, cʰ, kʰ (slightly aspirated)",before a pause associated with any juncture,N,N,N,N,N,N,N,N,N,N,N,N,N,N,N,N,N,N,N,N,Y,N,N,N,N,N,N,N,N,N,N,N,N,Y,N,N
Car Nicobarese,Braine 1970: 42,k,q (“back velar”),_ /a; ɔ/,N,N,N,Y,N,N,N,N,N,N,N,N,N,N,N,N,N,N,N,N,N,N,N,N,N,N,N,N,N,N,N,N,N,Y,N,N
Car Nicobarese,Braine 1970: 42,c,ʧ,_ V,N,Y,N,N,N,N,N,N,N,N,N,N,N,N,N,N,N,N,N,N,N,N,N,N,Y,N,N,N,N,N,N,N,N,N,N,N
Car Nicobarese,Braine 1970: 43,"m, n, ɲ, ŋ","bm, dn, ɟɲ, ɡŋ (pre-stopped)",V _ $ (syllable-finally after a stressed V),N,N,N,N,N,N,N,N,N,N,N,N,N,N,N,N,N,N,N,N,N,N,N,N,N,N,N,N,N,N,N,N,N,N,N,Y
Carib,Courtz 2008: 31,"p, t, k","b, d, ɡ",C V _,N,N,N,N,N,N,N,N,N,N,N,N,N,N,N,N,N,N,N,N,N,N,Y,N,N,N,N,N,N,N,N,N,N,Y,N,N
Carib,Courtz 2008: 31,"p, t, k","b, d, ɡ",nasal C_,N,N,N,N,N,N,N,N,N,N,N,N,N,N,N,N,N,N,N,N,N,N,Y,N,N,N,N,N,N,N,N,N,N,Y,N,N
Carib,Courtz 2008: 31,"p, t, k","ʰp, ʰt, ʰk",stressed VV _,N,N,N,N,N,N,N,N,N,N,N,N,N,N,N,N,N,N,N,Y,N,N,N,N,N,N,N,N,N,N,N,N,N,Y,N,N
Carib,Courtz 2008: 31,"p, t, k","ʔp, ʔt, ʔk",stressed V _,N,N,N,N,N,N,N,N,N,N,N,N,N,N,N,N,N,N,N,N,N,N,N,N,N,N,N,N,N,N,N,N,N,Y,N,N
Carib,Courtz 2008: 32,N (homorganic nasal),m; n (nasal C at place of C2),_ /p; t/,N,N,N,N,N,N,N,N,N,N,N,N,N,N,N,N,N,N,N,N,N,N,N,Y,N,N,N,N,N,N,N,N,N,N,N,Y
Carib,Courtz 2008: 32,s,ʃ,i _; _ i (adjacent to /i/),N,Y,N,N,N,N,N,N,N,N,N,N,N,N,N,N,N,N,N,N,N,N,N,N,N,N,N,N,N,N,N,N,N,N,N,N
Carib,Courtz 2008: 34,j,w,especially /back V/ _ a,N,N,N,N,N,N,N,N,N,N,N,N,N,N,N,N,N,N,N,N,N,N,N,N,N,N,N,N,N,N,N,N,Y,N,N,N
Chepang,Caughley 1969: 4,"t, d","t̪, d̪",/front V; j/ _; _ /front V; j/,N,N,N,N,N,N,N,N,N,N,N,N,N,N,N,N,N,N,N,N,N,N,N,N,N,N,N,N,N,N,N,N,N,Y,Y,N
Chepang,Caughley 1969: 4,"k, ɡ","k̟, ɡ̟ (fronted)",front V _; _ front V,N,N,N,N,N,N,N,N,N,N,N,N,N,N,N,N,N,N,N,N,N,N,N,N,N,N,N,N,N,N,N,N,N,Y,Y,N
Chepang,Caughley 1982: 35-36,"hm, hn, hŋ, hl, hr, hw, hj","m̥, n̥, ŋ̥, l̥, r̥, w̥, j̥",# _; _ # (word-marginally),N,N,N,N,N,N,N,N,N,N,N,N,N,N,N,N,N,N,Y,N,N,N,N,N,N,N,N,N,N,N,N,N,N,N,N,Y
Chepang,Caughley 1982: 35-36,"bh, dh, dʒh, ɡh","b̤, d̤, dʒ̤, ɡ̤",(all),N,N,N,N,N,N,N,N,N,N,N,N,N,N,N,Y,N,N,N,N,N,N,N,N,N,N,N,N,N,N,N,N,N,N,Y,N
Chepang,Caughley 1982: 35-36,"ph, th, tʃh, kh","pʰ, tʰ, tʃʰ, kʰ",(all),N,N,N,N,N,N,N,N,N,N,N,N,N,N,N,N,N,N,N,N,Y,N,N,N,N,N,N,N,N,N,N,N,N,Y,N,N
Chepang,Caughley 1982: 36,h,s,j _ tʃ,N,N,N,N,N,N,N,N,N,N,N,N,N,N,N,N,N,N,N,N,N,N,N,N,N,N,Y,N,N,N,N,N,N,N,N,N
Chepang,Caughley 1982: 36,s,ʃ,_ /e; i; y/,N,Y,N,N,N,N,N,N,N,N,N,N,N,N,N,N,N,N,N,N,N,N,N,N,N,N,N,N,N,N,N,N,N,N,N,N
Chepang,Caughley 1982: 37,"k, ɡ, ŋ","c, ɟ, ɲ",_ /i; e; j/; /i; e; j/ _,N,N,N,N,N,N,N,N,N,N,N,N,N,N,N,N,N,N,N,N,N,N,N,N,N,N,N,N,N,N,N,N,N,Y,Y,Y
Chepang,Caughley 1982: 37,w,w~ʋ,_ /i; e/; /i; e/_ (adjacent to front vowels),Y,N,N,N,N,N,N,N,N,N,N,N,N,N,N,N,N,N,N,N,N,N,N,N,N,N,N,N,N,N,N,N,Y,N,N,N
Chepang,Caughley 1982: 37,sj,ʃʲ,freely,N,Y,N,N,N,Y,N,N,N,N,N,N,N,N,N,N,N,N,N,N,N,N,N,N,N,N,N,N,N,N,N,N,N,N,N,N
Cheyenne,Frantz 1972: 11,"m, n, β","m̥, n̥, β̥",_ /voiceless segment/,N,N,N,N,N,N,N,N,N,N,N,N,N,N,N,N,N,N,Y,N,N,N,N,N,N,N,N,N,N,N,N,N,N,N,N,Y
Cheyenne,Frantz 1972: 11,k,kʲ,_ front V,N,N,N,N,N,Y,N,N,N,N,N,N,N,N,N,N,N,N,N,N,N,N,N,N,N,N,N,N,N,N,N,N,N,Y,N,N
Cheyenne,Frantz 1972: 11,k,kʲ,_ s,N,N,N,N,N,Y,N,N,N,N,N,N,N,N,N,N,N,N,N,N,N,N,N,N,N,N,N,N,N,N,N,N,N,Y,N,N
Cheyenne,Frantz 1972: 12,β,w,_ o,N,N,N,N,N,N,N,N,N,N,N,N,N,N,N,N,N,N,N,N,N,N,N,N,N,N,N,N,N,N,N,N,Y,N,N,N
Cheyenne,Frantz 1972: 12,β,w,/o; ɒ/ _ a,N,N,N,N,N,N,N,N,N,N,N,N,N,N,N,N,N,N,N,N,N,N,N,N,N,N,N,N,N,N,N,N,Y,N,N,N
Cheyenne,Frantz 1972: 12,s; ʃ,ʃ; s (total assimilation to following C),_ /ʃ; s/,N,Y,N,N,N,N,N,N,N,N,N,N,N,N,N,N,N,N,N,N,N,N,N,N,N,N,Y,N,N,N,N,N,N,N,N,N
Cheyenne,Frantz 1972: 12,x,xʷ,/o; ɒ/ _,N,N,N,N,N,N,Y,N,N,N,N,N,N,N,N,N,N,N,N,N,N,N,N,N,N,N,N,N,N,N,N,N,N,N,N,N
Cheyenne,Frantz 1972: 12,x,xʲ,e _,N,N,N,N,N,Y,N,N,N,N,N,N,N,N,N,N,N,N,N,N,N,N,N,N,N,N,N,N,N,N,N,N,N,N,N,N
Cheyenne,Frantz 1972: 13,s,ʃ,_ k,N,Y,N,N,N,N,N,N,N,N,N,N,N,N,N,N,N,N,N,N,N,N,N,N,N,N,N,N,N,N,N,N,N,N,N,N
Cheyenne,Frantz 1972: 9,t,ts,_ e,N,N,N,N,N,N,N,N,N,N,N,N,N,N,N,N,N,N,N,N,N,N,N,N,N,N,N,N,N,N,N,N,N,Y,N,N
Cocama,Faust and Pike 1959: 14,"p, t, k","pʰ, tʰ, kʰ",in stressed syllable,N,N,N,N,N,N,N,N,N,N,N,N,N,N,N,N,N,N,N,N,Y,N,N,N,N,N,N,N,N,N,N,N,N,Y,N,N
Cocama,Faust and Pike 1959: 14,"ts, tʃ","dz, dʒ",nasal C_,N,N,N,N,N,N,N,N,N,N,N,N,N,N,N,N,N,Y,N,N,N,N,N,N,N,N,N,N,N,N,N,N,N,N,N,N
Cocama,Faust and Pike 1959: 16,w,f,_ r,Y,N,N,N,N,N,N,N,N,N,N,N,N,N,N,N,N,N,N,N,N,N,N,N,N,Y,N,N,N,N,N,N,N,N,N,N
Cocama,Faust and Pike 1959: 16,w,β~v,_ high V,Y,N,N,N,N,N,N,N,N,N,N,N,N,N,N,N,N,Y,N,N,N,N,N,N,N,N,N,N,N,N,N,N,N,N,N,N
Cocama,Faust and Pike 1959: 18,C,C:,stressed V _,N,N,N,N,N,N,N,N,N,N,N,N,N,N,N,N,N,N,N,N,N,N,N,N,N,N,N,N,N,N,N,N,N,Y,Y,Y
Cocama,Faust and Pike 1959: 18,n,ŋ,_ #,N,N,N,N,N,N,N,N,N,N,N,N,N,N,N,N,N,N,N,N,N,N,N,Y,N,N,N,N,N,N,N,N,N,N,N,Y
Cocama,Faust and Pike 1959: 18,n,ŋ,_ velar C,N,N,N,N,N,N,N,N,N,N,N,N,N,N,N,N,N,N,N,N,N,N,N,Y,N,N,N,N,N,N,N,N,N,N,N,Y
Cocama,Faust and Pike 1959: 18,ð,j,_ i (and everywhere in some dialects),N,N,N,N,N,N,N,N,N,N,N,N,N,N,N,N,N,N,N,N,N,N,N,N,N,N,N,N,N,N,N,Y,N,N,N,N
Cocama,Faust and Pike 1959: 20,∅,ɣ,ɨ _ a,N,N,N,N,N,N,N,N,N,N,N,N,N,N,N,N,N,Y,N,N,N,N,N,N,N,N,N,N,N,N,N,N,N,N,N,N
Dakota,Boas and Deloria 1939: 10,∅,w,e _ /o; a/,N,N,N,N,N,N,N,N,N,N,N,N,N,N,N,N,N,N,N,N,N,N,N,N,N,N,N,N,N,N,N,N,Y,N,N,N
Dakota,Boas and Deloria 1939: 10,∅,w,o _ i,N,N,N,N,N,N,N,N,N,N,N,N,N,N,N,N,N,N,N,N,N,N,N,N,N,N,N,N,N,N,N,N,Y,N,N,N
Dakota,Boas and Deloria 1939: 10,∅,w,ũ _ e,N,N,N,N,N,N,N,N,N,N,N,N,N,N,N,N,N,N,N,N,N,N,N,N,N,N,N,N,N,N,N,N,Y,N,N,N
Dakota,Boas and Deloria 1939: 10,∅,j,i _ /a; o; u/,N,N,N,N,N,N,N,N,N,N,N,N,N,N,N,N,N,N,N,N,N,N,N,N,N,N,N,N,N,N,N,Y,N,N,N,N
Dakota,Boas and Deloria 1939: 11,"b, l","m, n",_ nasal V,N,N,N,N,N,N,N,N,N,N,N,N,N,N,N,N,N,N,N,N,N,N,N,Y,N,N,N,N,N,N,N,N,N,N,Y,N
Dakota,Boas and Deloria 1939: 11,j,w,/u; ũ; o/ _,N,N,N,N,N,N,N,N,N,N,N,N,N,N,N,N,N,N,N,N,N,N,N,N,N,N,N,N,N,N,N,N,Y,N,N,N
Dakota,Boas and Deloria 1939: 12,"p, t","m, n",nasal V _,N,N,N,N,N,N,N,N,N,N,N,N,N,N,N,N,N,N,N,N,N,N,N,Y,N,N,N,N,N,N,N,N,N,Y,N,N
Dakota,Boas and Deloria 1939: 13-14,k,c,/e; i; ĩ/ _,N,N,N,N,N,N,N,N,N,N,N,N,N,N,N,N,N,N,N,N,N,N,N,N,N,N,N,N,N,N,N,N,N,Y,N,N
Dan,Bearth and Zemp 1967: 14,"ɡb, kp","ɡm, km",_ nasal V,N,N,N,N,N,N,N,N,N,N,Y,N,N,N,N,N,N,N,N,N,N,N,N,N,N,N,N,N,N,N,N,N,N,N,N,N
Dan,Bearth and Zemp 1967: 14-15,l,ɾ,/t; d; s; z/ _ V,N,N,N,N,N,N,N,N,N,N,N,N,N,N,N,N,N,N,N,N,N,N,N,N,N,N,N,N,N,Y,N,N,N,N,N,N
Dan,Bearth and Zemp 1967: 15,"w, j","ŋw̃, ɲj̃",_ nasal V,N,N,N,N,N,N,N,N,N,Y,N,N,N,N,N,N,N,N,N,N,N,N,N,N,N,N,N,N,N,N,N,N,N,N,N,N
Dan,Bearth and Zemp 1967: 15,"s, z","ʂ, ʐ",_l,N,N,Y,N,N,N,N,N,N,N,N,N,N,N,N,N,N,N,N,N,N,N,N,N,N,N,N,N,N,N,N,N,N,N,N,N
Dan,Bearth and Zemp 1967: 17,"zʲ, sʲ","ʒ, ʃ",(all),N,Y,N,N,N,N,N,N,N,N,N,N,N,N,N,N,N,N,N,N,N,N,N,N,N,N,N,N,N,N,N,N,N,N,N,N
Dan,Bearth and Zemp 1967: 19,N (homorganic nasal),ŋ,_ # (preceding pause),N,N,N,N,N,N,N,N,N,N,N,N,N,N,N,N,N,N,N,N,N,N,N,Y,N,N,N,N,N,N,N,N,N,N,N,Y
Gugada,Platt 1972: 5,"d̪, n̪, l̪","d, n, l (lamino-alveolar)",_ i,N,N,N,N,N,N,N,N,N,N,N,N,N,N,N,N,N,N,N,N,N,N,N,N,N,N,N,N,N,N,N,N,N,N,Y,Y
Gugada,Platt 1972: 5,"p, t, t̪, ʈ, k","b, d, d̪, ɖ, ɡ",nasal C_,N,N,N,N,N,N,N,N,N,N,N,N,N,N,N,N,N,N,N,N,N,N,Y,N,N,N,N,N,N,N,N,N,N,Y,N,N
Gugada,Platt 1972: 5,"p, t, t̪, ʈ, k","b, d, d̪, ɖ, ɡ",V _ V,N,N,N,N,N,N,N,N,N,N,N,N,N,N,N,N,N,N,N,N,N,N,Y,N,N,N,N,N,N,N,N,N,N,Y,N,N
Gugada,Platt 1972: 6,"n̪, ŋ","n̪̥, ŋ̥",_ #,N,N,N,N,N,N,N,N,N,N,N,N,N,N,N,N,N,N,Y,N,N,N,N,N,N,N,N,N,N,N,N,N,N,N,N,Y
Island Carib,Taylor 1955: 235,"b, f, m, t, d, s, n, r, l, ɡ","bː, fː, mː, tː, dː, sː, nː, rː, lː, ɡː",in a post-stress syllable,N,N,N,N,N,N,N,N,N,N,N,N,N,N,N,N,N,N,N,N,N,N,N,N,N,N,N,N,N,N,N,N,N,Y,Y,Y
Island Carib,Taylor 1955: 235,"p, k","b, ɡ",V _ V,N,N,N,N,N,N,N,N,N,N,N,N,N,N,N,N,N,N,N,N,N,N,Y,N,N,N,N,N,N,N,N,N,N,Y,N,N
Island Carib,Taylor 1955: 235,"p, t, k, t͡ʃ","pʰ, tʰ, kʰ, t͡ʃʰ","in stressed syllable, especially after a pause",N,N,N,N,N,N,N,N,N,N,N,N,N,N,N,N,N,N,N,N,Y,N,N,N,N,N,N,N,N,N,N,N,N,Y,N,N
Island Carib,Taylor 1955: 235,ʃ,tʃ,in stressed syllable,N,N,N,N,N,N,N,N,N,N,N,N,N,N,N,N,N,N,N,N,N,N,N,N,Y,N,N,N,N,N,N,N,N,N,N,N
Island Carib,Taylor 1955: 235,h,ɦ,V _ V,N,N,N,N,N,N,N,N,N,N,N,N,N,N,N,Y,N,N,N,N,N,N,N,N,N,N,N,N,N,N,N,N,N,N,N,N
Jivaro,Turner 1958: 11,w,β~v,i _; _ i (adjacent to /i/),Y,N,N,N,N,N,N,N,N,N,N,N,N,N,N,N,N,Y,N,N,N,N,N,N,N,N,N,N,N,N,N,N,N,N,N,N
Jivaro,Turner 1958: 3-4,"p, t, k, m, n, h","pʲ, tʲ, kʲ, mʲ, nʲ, hʲ",i (/N; t; h/) _,N,N,N,N,N,Y,N,N,N,N,N,N,N,N,N,N,N,N,N,N,N,N,N,N,N,N,N,N,N,N,N,N,N,Y,N,Y
Jivaro,Turner 1958: 4,"p, m","pʷ, mʷ",_ ɨ,N,N,N,N,N,N,Y,N,N,N,N,N,N,N,N,N,N,N,N,N,N,N,N,N,N,N,N,N,N,N,N,N,N,Y,N,Y
Jivaro,Turner 1958: 5,t,tʲ,_ i,N,N,N,N,N,Y,N,N,N,N,N,N,N,N,N,N,N,N,N,N,N,N,N,N,N,N,N,N,N,N,N,N,N,Y,N,N
Jivaro,Turner 1958: 7,ts,dz,homorganic nasal C _,N,N,N,N,N,N,N,N,N,N,N,N,N,N,N,N,N,Y,N,N,N,N,N,N,N,N,N,N,N,N,N,N,N,N,N,N
Jivaro,Turner 1958: 7,tʃ,dʒ,nasal C _,N,N,N,N,N,N,N,N,N,N,N,N,N,N,N,N,N,Y,N,N,N,N,N,N,N,N,N,N,N,N,N,N,N,N,N,N
Jivaro,Turner 1958: 8,n,ɲ,i _; _ i ,N,N,N,N,N,N,N,N,N,N,N,N,N,N,N,N,N,N,N,N,N,N,N,N,N,N,N,N,N,N,N,N,N,N,N,Y
Jivaro,Turner 1958: 8,h,hʷ,u _,N,N,N,N,N,N,Y,N,N,N,N,N,N,N,N,N,N,N,N,N,N,N,N,N,N,N,N,N,N,N,N,N,N,N,N,N
Kadiwéu,Sandalo 1997: 16,"m, n, l, w, j",∅ (elides),_ #,N,N,N,N,N,N,N,N,N,N,N,N,N,N,N,N,N,N,N,N,N,N,N,N,N,N,N,N,N,N,N,N,N,N,N,Y
Kadiwéu,Sandalo 1997: 16,d,ɾ,V _ V,N,N,N,N,N,N,N,N,N,N,N,N,N,N,N,N,N,N,N,N,N,N,N,N,N,N,N,N,N,Y,N,N,N,N,Y,N
Kadiwéu,Sandalo 1997: 16,d,t,_ #,N,N,N,N,N,N,N,N,N,N,N,N,N,N,N,N,N,N,N,N,N,Y,N,N,N,N,N,N,N,N,N,N,N,N,Y,N
Kalaallisut,Fortescue 1984: 333,t,ts,_ i ,N,N,N,N,N,N,N,N,N,N,N,N,N,N,N,N,N,N,N,N,N,N,N,N,N,N,N,N,N,N,N,N,N,Y,N,N
Kalaallisut,Fortescue 1984: 333,k,c̠,"_ i, i _ (adjacent to /i/)",N,N,N,N,N,N,N,N,N,N,N,N,N,N,N,N,N,N,N,N,N,N,N,N,N,N,N,N,N,N,N,N,N,Y,N,N
Kalaallisut,Fortescue 1984: 333,q,χ~ʁ,V _ V,N,N,N,N,N,N,N,N,N,N,N,N,N,N,N,N,N,Y,N,N,N,N,N,N,N,N,N,N,N,N,N,N,N,N,N,N
Kalaallisut,Fortescue 1984: 333-334,β,v,younger speakers,Y,N,N,N,N,N,N,N,N,N,N,N,N,N,N,N,N,N,N,N,N,N,N,N,N,N,N,N,N,N,N,N,N,N,N,N
Kalaallisut,Fortescue 1984: 333-335,"t, s, n, l","tʲ, sʲ, nʲ, lʲ (slightly palatalized)",_ i; i _ (adjacent to /i/),N,N,N,N,N,Y,N,N,N,N,N,N,N,N,N,N,N,N,N,N,N,N,N,N,N,N,N,N,N,N,N,N,N,Y,N,Y
Kalaallisut,Fortescue 1984: 334,ʁŋ,ɴ,(all),N,N,N,Y,N,N,N,N,N,N,N,N,N,N,N,N,N,N,N,N,N,N,N,N,N,N,N,N,N,N,N,N,N,N,N,Y
Kalaallisut,Fortescue 1984: 334,"ɣ, ŋ","ʝ̠, ɲ̠ (post-palatal)",_ i ,N,N,N,N,N,N,N,N,N,N,N,N,N,N,N,N,N,N,N,N,N,N,N,N,N,N,N,N,N,N,N,N,N,N,N,Y
Kalaallisut,Fortescue 1984: 334,ŋ,nasalized V,V _ V,N,N,N,N,N,N,N,N,N,N,N,N,N,N,N,N,N,N,N,N,N,N,N,N,N,N,N,N,N,N,N,N,N,N,N,Y
Kalaallisut,Fortescue 1984: 334,ɣ,j,/i; u/ _,N,N,N,N,N,N,N,N,N,N,N,N,N,N,N,N,N,N,N,N,N,N,N,N,N,N,N,N,N,N,N,Y,N,N,N,N
Kalaallisut,Fortescue 1984: 334,ʂ,s,younger speakers,N,N,N,N,N,N,N,N,N,N,N,N,N,N,N,N,N,N,N,N,N,N,N,N,N,N,Y,N,N,N,N,N,N,N,N,N
Kalaallisut,Fortescue 1984: 334,s,z (somewhat voiced),V _ V,N,N,N,N,N,N,N,N,N,N,N,N,N,N,N,N,N,Y,N,N,N,N,N,N,N,N,N,N,N,N,N,N,N,N,N,N
Kalaallisut,Fortescue 1984: 335,∅,w,u _ V,N,N,N,N,N,N,N,N,N,N,N,N,N,N,N,N,N,N,N,N,N,N,N,N,N,N,N,N,N,N,N,N,Y,N,N,N
Kalaallisut,Fortescue 1984: 335,∅,j,i _ V,N,N,N,N,N,N,N,N,N,N,N,N,N,N,N,N,N,N,N,N,N,N,N,N,N,N,N,N,N,N,N,Y,N,N,N,N
Kalaallisut,Fortescue 1984: 335,∅,ʔ,# _ V,N,N,N,N,N,N,N,N,N,N,N,N,N,N,N,N,N,N,N,N,N,N,N,N,N,N,N,Y,N,N,N,N,N,N,N,N
Kalaallisut,Fortescue 1984: 336,"p, t, k, q",∅,_ # (word-finally within phrases),N,N,N,N,N,N,N,N,N,N,N,N,N,N,N,N,N,N,N,N,N,N,N,N,N,N,N,N,N,N,N,N,N,Y,N,N
Kalaallisut,Fortescue 1984: 337,"ʁp, ʁt, ʁk, ʁm, ʁn, ʁv, ʁl, ʁs","pːˤ, tːˤ, kːˤ, mːˤ, nːˤ, fːˤ, ɬːˤ, sːˤ",(all),N,N,N,N,N,N,N,Y,N,N,N,N,N,N,N,N,N,N,N,N,N,N,N,N,N,N,N,N,N,N,N,N,N,Y,N,Y
Kalaallisut,"Fortescue 1984: 337, 344",C1,C2 (total assimilation to simple geminate),_ C2,N,N,N,N,N,N,N,N,N,N,N,N,N,N,N,N,N,N,N,N,N,N,N,N,N,Y,N,N,N,N,N,N,N,Y,N,Y
Kanakuru,Newman 1974: 10,"labial C/ui/, non-labial C/oi/","Cʷiː, Cʷei",(none),N,N,N,N,N,N,Y,N,N,N,N,N,N,N,N,N,N,N,N,N,N,N,N,N,N,N,N,N,N,N,N,N,N,Y,Y,Y
Kanakuru,Newman 1974: 11,i ,j,V1 _ V3,N,N,N,N,N,N,N,N,N,N,N,N,N,N,N,N,N,N,N,N,N,N,N,N,N,N,N,N,N,N,N,Y,N,N,N,N
Kanakuru,Newman 1974: 4,"p, t, k","w, r, ɣ̞",V _ V,N,N,N,N,N,N,N,N,N,N,N,N,N,N,N,N,N,N,N,N,N,N,N,N,N,N,N,N,N,Y,N,N,Y,Y,N,N
Kanakuru,Newman 1974: 5,"p, t, k, kʷ","b, d, ɡ, ɡʷ",C _ (when C is voiced consonant with same coronal value),N,N,N,N,N,N,N,N,N,N,N,N,N,N,N,N,N,N,N,N,N,N,Y,N,N,N,N,N,N,N,N,N,N,Y,N,N
Kanakuru,Newman 1974: 6,"r, ɣ","n, ŋ",_ nasal sonorant,N,N,N,N,N,N,N,N,N,N,N,N,N,N,N,N,N,N,N,N,N,N,N,Y,N,N,N,N,N,N,N,N,N,N,N,N
Kanakuru,Newman 1974: 6,w,m,_ nasal sonorant,N,N,N,N,N,N,N,N,N,N,N,N,N,N,N,N,N,N,N,N,N,N,N,Y,N,N,N,N,N,N,N,N,N,N,N,N
Kanakuru,Newman 1974: 7,n,l,l _,N,N,N,N,N,N,N,N,N,N,N,N,N,N,N,N,N,N,N,N,N,N,N,N,N,N,N,N,N,N,Y,N,N,N,N,Y
Kanakuru,Newman 1974: 7,w,p,_ C,N,N,N,N,N,N,N,N,N,N,N,N,N,N,N,N,N,N,N,N,N,Y,N,N,N,N,N,N,N,N,N,N,N,N,N,N
Kanakuru,Newman 1974: 8,ɣ̞,w,/u; o/ _; _ /u; o/ (adjacent to /u; o/),N,N,N,N,N,N,N,N,N,N,N,N,N,N,N,N,N,N,N,N,N,N,N,N,N,N,N,N,N,N,N,N,Y,N,N,N
Kanakuru,Newman 1974: 8,l,r,_ r,N,N,N,N,N,N,N,N,N,N,N,N,N,N,N,N,N,N,N,N,N,N,N,N,N,N,N,N,N,Y,N,N,N,N,N,N
Kanuri,Cyffer 1998: 20,n,m; l (assimilates to C1),/m; l/ _,N,N,N,N,N,N,N,N,N,N,N,N,N,N,N,N,N,N,N,N,N,N,N,Y,N,N,N,N,N,N,Y,N,N,N,N,Y
Kanuri,Cyffer 1998: 20,ɡ,l,l _,N,N,N,N,N,N,N,N,N,N,N,N,N,N,N,N,N,N,N,N,N,N,N,N,N,N,N,N,N,N,Y,N,N,N,Y,N
Kanuri,Cyffer 1998: 20,t,n,_ n,N,N,N,N,N,N,N,N,N,N,N,N,N,N,N,N,N,N,N,N,N,N,N,Y,N,N,N,N,N,N,N,N,N,Y,N,N
Kanuri,Cyffer 1998: 20,s,k,_ k,N,N,N,N,N,N,N,N,N,N,N,N,N,N,N,N,N,N,N,N,N,Y,N,N,N,N,N,N,N,N,N,N,N,N,N,N
Kanuri,Cyffer 1998: 21,k,ʧ,# _ /e; i/,N,Y,N,N,N,N,N,N,N,N,N,N,N,N,N,N,N,N,N,N,N,N,N,N,Y,N,N,N,N,N,N,N,N,Y,N,N
Kanuri,Cyffer 1998: 21,s,ʧ,plosive _ /e; i/,N,Y,N,N,N,N,N,N,N,N,N,N,N,N,N,N,N,N,N,N,N,N,N,N,Y,N,N,N,N,N,N,N,N,N,N,N
Kanuri,Cyffer 1998: 21,s,ʤ,sonorant _ /e; i/,N,Y,N,N,N,N,N,N,N,N,N,N,N,N,N,N,N,Y,N,N,N,N,N,N,N,N,N,N,N,N,N,N,N,N,N,N
Kanuri,Cyffer 1998: 21,s,ʤ,V _ V,N,Y,N,N,N,N,N,N,N,N,N,N,N,N,N,N,N,Y,N,N,N,N,N,N,N,N,N,N,N,N,N,N,N,N,N,N
Kanuri,Cyffer 1998: 22,"k, ɡ",w,/o; u/ _,N,N,N,N,N,N,N,N,N,N,N,N,N,N,N,N,N,N,N,N,N,N,N,N,N,N,N,N,N,N,N,N,Y,Y,Y,N
Kanuri,Cyffer 1998: 22,"k, ɡ",j,/e; i/_,N,N,N,N,N,N,N,N,N,N,N,N,N,N,N,N,N,N,N,N,N,N,N,N,N,N,N,N,N,N,N,Y,N,Y,Y,N
Kanuri,Cyffer 1998: 22,b,w,/liquid; V/ _,N,N,N,N,N,N,N,N,N,N,N,N,N,N,N,N,N,N,N,N,N,N,N,N,N,N,N,N,N,N,N,N,Y,N,Y,N
Kanuri,Cyffer 1998: 22,ɡ,ɣ,sonorant _ sonorant,N,N,N,N,N,N,N,N,N,N,N,N,N,N,N,N,N,Y,N,N,N,N,N,N,N,N,N,N,N,N,N,N,N,N,Y,N
Kanuri,Cyffer 1998: 22,"k, t, s, ʧ","ɡ, d, z, dʒ",/V; sonorant C/ _ V,N,N,N,N,N,N,N,N,N,N,N,N,N,N,N,N,N,Y,N,N,N,N,Y,N,N,N,N,N,N,N,N,N,N,Y,N,N
Kanuri,Cyffer 1998: 22,k:,k,none specified,N,N,N,N,N,N,N,N,N,N,N,N,N,N,N,N,N,N,N,N,N,Y,N,N,N,N,N,N,N,N,N,N,N,N,N,N
Kanuri,Cyffer 1998: 23,n,ŋ,_ /k; ɡ/,N,N,N,N,N,N,N,N,N,N,N,N,N,N,N,N,N,N,N,N,N,N,N,Y,N,N,N,N,N,N,N,N,N,N,N,Y
Kanuri,Cyffer 1998: 23,"k, ɡ",∅,/a; e; i/ _ /a; e; i/,N,N,N,N,N,N,N,N,N,N,N,N,N,N,N,N,N,N,N,N,N,N,N,N,N,N,N,N,N,N,N,N,N,Y,Y,N
Kanuri,Cyffer 1998: 23,ɡ,∅,/back V; central V/ _ /back V; central V/,N,N,N,N,N,N,N,N,N,N,N,N,N,N,N,N,N,N,N,N,N,N,N,N,N,N,N,N,N,N,N,N,N,N,Y,N
Kanuri,Cyffer 1998: 23,l,ɭ,_ i,N,N,Y,N,N,N,N,N,N,N,N,N,N,N,N,N,N,N,N,N,N,N,N,N,N,N,N,N,N,N,N,N,N,N,N,N
Karok,Bright 1957: 8,x,xʷ,/u; o/ (C) _,N,N,N,N,N,N,Y,N,N,N,N,N,N,N,N,N,N,N,N,N,N,N,N,N,N,N,N,N,N,N,N,N,N,N,N,N
Karok,Bright 1957: 9,C,C:,_ long accented V,N,N,N,N,N,N,N,N,N,N,N,N,N,N,N,N,N,N,N,N,N,N,N,N,N,N,N,N,N,N,N,N,N,Y,N,Y
Karok,Bright 1957: 9,C,C:,long accented V _,N,N,N,N,N,N,N,N,N,N,N,N,N,N,N,N,N,N,N,N,N,N,N,N,N,N,N,N,N,N,N,N,N,Y,N,Y
Koiari,Dutton 1996: 6,"V, C","V:, C:",in a stressed syllable,N,N,N,N,N,N,N,N,N,N,N,N,N,N,N,N,N,N,N,N,N,N,N,N,N,N,N,N,N,N,N,N,N,N,Y,Y
Koiari,Dutton 1996: 6,β,w,_ /u; o; a/,N,N,N,N,N,N,N,N,N,N,N,N,N,N,N,N,N,N,N,N,N,N,N,N,N,N,N,N,N,N,N,N,Y,N,N,N
Koiari,Dutton 1996: 6,e,j,a _ a,N,N,N,N,N,N,N,N,N,N,N,N,N,N,N,N,N,N,N,N,N,N,N,N,N,N,N,N,N,N,N,Y,N,N,N,N
Koiari,Dutton 1996: 6,ɸ,p,# _ /u; o/,N,N,N,N,N,N,N,N,N,N,N,N,N,N,N,N,N,N,N,N,N,Y,N,N,N,N,N,N,N,N,N,N,N,N,N,N
Kui,Winfield 1928: 4,"p, t, ʈ, k, s, ç","b, d, ɖ, ɡ, z, ʝ",voiced obstruent _,N,N,N,N,N,N,N,N,N,N,N,N,N,N,N,N,N,Y,N,N,N,N,Y,N,N,N,N,N,N,N,N,N,N,Y,N,N
Kui,Winfield 1928: 5,"p, t, ʈ, k, s, ç","b, d, ɖ, ɡ, z, ʝ",nasal C _,N,N,N,N,N,N,N,N,N,N,N,N,N,N,N,N,N,Y,N,N,N,N,Y,N,N,N,N,N,N,N,N,N,N,Y,N,N
Kui,Winfield 1928: 6,s,h,"freely, dialectal",N,N,N,N,N,N,N,N,N,N,N,N,N,N,N,N,N,N,N,N,N,N,N,N,N,N,N,N,Y,N,N,N,N,N,N,N
Kuku Yalanji,Patz 1982: 32-34,"d, r",ɾ,V _ V,N,N,N,N,N,N,N,N,N,N,N,N,N,N,N,N,N,N,N,N,N,N,N,N,N,N,N,N,N,Y,N,N,N,N,Y,N
Kuku Yalanji,Patz 1982: 34,"p, t, k","b, d, ɡ",V _ V,N,N,N,N,N,N,N,N,N,N,N,N,N,N,N,N,N,N,N,N,N,N,Y,N,N,N,N,N,N,N,N,N,N,Y,N,N
Kuku Yalanji,Patz 1982: 34,l,ɫ,/ɑ; u/ _,N,N,N,N,N,N,N,N,Y,N,N,N,N,N,N,N,N,N,N,N,N,N,N,N,N,N,N,N,N,N,N,N,N,N,N,N
Kuku Yalanji,Patz 1982: 53,n,ɲ,_ ʤ,N,N,N,N,N,N,N,N,N,N,N,N,N,N,N,N,N,N,N,N,N,N,N,N,N,N,N,N,N,N,N,N,N,N,N,Y
Kuku Yalanji,Patz 1982: 53-54,k,kʷ,_ u,N,N,N,N,N,N,Y,N,N,N,N,N,N,N,N,N,N,N,N,N,N,N,N,N,N,N,N,N,N,N,N,N,N,Y,N,N
Lahu,Matisoff 1973: 19,"u, o, ɔ","wi, we, wɛ",freely,N,N,N,N,N,N,N,N,N,N,N,N,N,N,N,N,N,N,N,N,N,N,N,N,N,N,N,N,N,N,N,N,Y,N,N,N
Lahu,Matisoff 1973: 3,"p, pʰ, b, m","pf, pfʰ, bv, mv",_ u,Y,N,N,N,N,N,N,N,N,N,N,N,N,N,N,N,N,Y,N,N,N,N,N,N,N,N,N,N,N,N,N,N,N,Y,Y,Y
Lahu,Matisoff 1973: 4,v,vʷ,_ /ɨ; ə/,N,N,N,N,N,N,Y,N,N,N,N,N,N,N,N,N,N,N,N,N,N,N,N,N,N,N,N,N,N,N,N,N,N,N,N,N
Lahu,Matisoff 1973: 5,n,nʲ,_ i,N,N,N,N,N,Y,N,N,N,N,N,N,N,N,N,N,N,N,N,N,N,N,N,N,N,N,N,N,N,N,N,N,N,N,N,Y
Lahu,Matisoff 1973: 5-6,j,ʝ,_ /i; e/,N,N,N,N,N,N,N,N,N,N,N,N,N,N,N,N,N,Y,N,N,N,N,N,N,N,N,N,N,N,N,N,N,N,N,N,N
Lahu,Matisoff 1973: 6,"c, cʰ, ɟ, ʃ, j","ts, tsʰ, dz, s, z",_ ɨ,N,N,N,N,N,N,N,N,N,N,N,N,N,N,N,N,N,Y,N,N,N,N,N,N,N,N,Y,N,N,N,N,N,N,N,N,N
Latin,Kent 1945: 51,p,t; s (total assimilation to following C),_ /t; s/,N,N,N,N,N,N,N,N,N,N,N,N,N,N,N,N,N,N,N,N,N,Y,N,N,N,N,Y,N,N,N,N,N,N,Y,N,N
Latin,Kent 1945: 52,"k, ɡ","c, ɟ",_ front V,N,N,N,N,N,N,N,N,N,N,N,N,N,N,N,N,N,N,N,N,N,N,N,N,N,N,N,N,N,N,N,N,N,Y,Y,N
Latin,"Kent 1945: 53, 56, 58","m, n",m; n; ŋ (nasal C at place of C2),_ C2,N,N,N,N,N,N,N,N,N,N,N,N,N,N,N,N,N,N,N,N,N,N,N,Y,N,N,N,N,N,N,N,N,N,N,N,Y
Latin,Kent 1945: 54,"m, n",∅,_ ŋŋ,N,N,N,N,N,N,N,N,N,N,N,N,N,N,N,N,N,N,N,N,N,N,N,N,N,N,N,N,N,N,N,N,N,N,N,Y
Latin,Kent 1945: 54,ɡ,ŋ,_ nasal C,N,N,N,N,N,N,N,N,N,N,N,N,N,N,N,N,N,N,N,N,N,N,N,Y,N,N,N,N,N,N,N,N,N,N,Y,N
Latin,Kent 1945: 58,m,∅,_ ##,N,N,N,N,N,N,N,N,N,N,N,N,N,N,N,N,N,N,N,N,N,N,N,N,N,N,N,N,N,N,N,N,N,N,N,Y
Latin,Kent 1945: 58-59,"m, n",∅,_ C,N,N,N,N,N,N,N,N,N,N,N,N,N,N,N,N,N,N,N,N,N,N,N,N,N,N,N,N,N,N,N,N,N,N,N,Y
Logba,"Dorvlo 2008: 17, 34","s, z, n","ʃ, ʒ, ɲ",_ i,N,Y,N,N,N,N,N,N,N,N,N,N,N,N,N,N,N,N,N,N,N,N,N,N,N,N,N,N,N,N,N,N,N,N,N,Y
Logba,"Dorvlo 2008: 17, 34","t, d","ts, dz",_ i,N,N,N,N,N,N,N,N,N,N,N,N,N,N,N,N,N,Y,N,N,N,N,N,N,N,N,N,N,N,N,N,N,N,Y,N,N
Logba,Dorvlo 2008: 18,t,ts,_ /i; u/,N,N,N,N,N,N,N,N,N,N,N,N,N,N,N,N,N,N,N,N,N,N,N,N,N,N,N,N,N,N,N,N,N,Y,N,N
Logba,Dorvlo 2008: 19,"m, n, ɲ, ŋ",m̩; n̩; ɲ̩; ŋ̩ (syllabic nasal at place of C2),_ C2,N,N,N,N,N,N,N,N,N,N,N,N,N,N,N,N,N,N,N,N,N,N,N,N,N,N,N,N,N,N,N,N,N,N,N,Y
Logba,Dorvlo 2008: 20,l,r,C _,N,N,N,N,N,N,N,N,N,N,N,N,N,N,N,N,N,N,N,N,N,N,N,N,N,N,N,N,N,Y,N,N,N,N,N,N
Ma'ya,van der Leeden 1993: 18-19,"p, t, k","b, d, ɡ",_ voiced stop,N,N,N,N,N,N,N,N,N,N,N,N,N,N,N,N,N,N,N,N,N,N,Y,N,N,N,N,N,N,N,N,N,N,Y,N,N
Ma'ya,Van der Leeden 1993: 21,"kj, ɡj","kʲ, gʲ",(all),N,N,N,N,N,Y,N,N,N,N,N,N,N,N,N,N,N,N,N,N,N,N,N,N,N,N,N,N,N,N,N,N,N,Y,Y,N
Ma'ya,van der Leeden 1993: 25,n,m; ŋ (nasal C at place of C2),_ C2,N,N,N,N,N,N,N,N,N,N,N,N,N,N,N,N,N,N,N,N,N,N,N,Y,N,N,N,N,N,N,N,N,N,N,N,Y
Ma'ya,Van der Leeden 1993: 28,l,ɭ,back V _ V,N,N,Y,N,N,N,N,N,N,N,N,N,N,N,N,N,N,N,N,N,N,N,N,N,N,N,N,N,N,N,N,N,N,N,N,N
Ma'ya,Van der Leeden 1993: 28,l,ɭ,V _ #,N,N,Y,N,N,N,N,N,N,N,N,N,N,N,N,N,N,N,N,N,N,N,N,N,N,N,N,N,N,N,N,N,N,N,N,N
Maidu,Shipley 1964: 8,"p, t, c, k","pʰ, tʰ, cʰ, kʰ",_ V,N,N,N,N,N,N,N,N,N,N,N,N,N,N,N,N,N,N,N,N,Y,N,N,N,N,N,N,N,N,N,N,N,N,Y,N,N
Maidu,Shipley 1964: 8,"p, t, c, k","pʰ, tʰ, cʰ, kʰ",preceding pause,N,N,N,N,N,N,N,N,N,N,N,N,N,N,N,N,N,N,N,N,Y,N,N,N,N,N,N,N,N,N,N,N,N,Y,N,N
Maidu,Shipley 1964: 8,k,c,_ /i; e/; /i; e/_C,N,N,N,N,N,N,N,N,N,N,N,N,N,N,N,N,N,N,N,N,N,N,N,N,N,N,N,N,N,N,N,N,N,Y,N,N
Maidu,Shipley 1964: 9,m,ŋ,_ velar C,N,N,N,N,N,N,N,N,N,N,N,N,N,N,N,N,N,N,N,N,N,N,N,Y,N,N,N,N,N,N,N,N,N,N,N,Y
Maidu,"Shipley 1964: 9-10, 13","m, n","m̥, n̥ (varying degrees of devoicing)",_ C,N,N,N,N,N,N,N,N,N,N,N,N,N,N,N,N,N,N,Y,N,N,N,N,N,N,N,N,N,N,N,N,N,N,N,N,Y
Maidu,"Shipley 1964: 9-10, 13","m, n","m̥, n̥ (varying degrees of devoicing)",preceding pause,N,N,N,N,N,N,N,N,N,N,N,N,N,N,N,N,N,N,Y,N,N,N,N,N,N,N,N,N,N,N,N,N,N,N,N,Y
Margi,Hoffman 1963: 42,C,Cʷ,u _,N,N,N,N,N,N,Y,N,N,N,N,N,N,N,N,N,N,N,N,N,N,N,N,N,N,N,N,N,N,N,N,N,N,Y,Y,Y
Maybrat,"Dol 2007: 15, 17","i, u","j, w",V _ #,N,N,N,N,N,N,N,N,N,N,N,N,N,N,N,N,N,N,N,N,N,N,N,N,N,N,N,N,N,N,N,Y,Y,N,N,N
Maybrat,Dol 2007: 21-22,k,ɡ,# _,N,N,N,N,N,N,N,N,N,N,N,N,N,N,N,N,N,N,N,N,N,N,Y,N,N,N,N,N,N,N,N,N,N,Y,N,N
Maybrat,Dol 2007: 21-22,"p, k","b, ɡ",V _ V,N,N,N,N,N,N,N,N,N,N,N,N,N,N,N,N,N,N,N,N,N,N,Y,N,N,N,N,N,N,N,N,N,N,Y,N,N
Maybrat,Dol 2007: 22-23,m,ŋ,_ k,N,N,N,N,N,N,N,N,N,N,N,N,N,N,N,N,N,N,N,N,N,N,N,Y,N,N,N,N,N,N,N,N,N,N,N,Y
Modern Greek,Householder et al. 1964: 10,"t, d, θ, ð, s, z",∅,_ s,N,N,N,N,N,N,N,N,N,N,N,N,N,N,N,N,N,N,N,N,N,N,N,N,N,N,N,N,N,N,N,N,N,Y,Y,N
Modern Greek,Householder et al. 1964: 10,"p, b, f, v; k, ɡ, x, ɣ (labial and velar obstruents)",p; k,_ s,N,N,N,N,N,N,N,N,N,N,N,N,N,N,N,N,N,N,N,N,N,Y,N,N,N,N,N,N,N,N,N,N,N,N,Y,N
Modern Greek,Householder et al. 1964: 10,ɣ,j,_ front V,N,N,N,N,N,N,N,N,N,N,N,N,N,N,N,N,N,N,N,N,N,N,N,N,N,N,N,N,N,N,N,Y,N,N,N,N
Modern Greek,Householder et al. 1964: 20,v,f,/a; e/ _ voiceless C,N,N,N,N,N,N,N,N,N,N,N,N,N,N,N,N,N,N,N,N,N,N,N,N,N,Y,N,N,N,N,N,N,N,N,N,N
Modern Greek,Householder et al. 1964: 20,s,z,_ /voiced fricative; voiced stop; voiced nasal/,N,N,N,N,N,N,N,N,N,N,N,N,N,N,N,N,N,Y,N,N,N,N,N,N,N,N,N,N,N,N,N,N,N,N,N,N
Moro,Black 1971: 1-2,"p, k","pʰ, kʰ",freely,N,N,N,N,N,N,N,N,N,N,N,N,N,N,N,N,N,N,N,N,Y,N,N,N,N,N,N,N,N,N,N,N,N,Y,N,N
Moro,"Black 1971: 1, 3","b, ɡ","b~β, ɡ~ɣ",word-medially,N,N,N,N,N,N,N,N,N,N,N,N,N,N,N,N,N,Y,N,N,N,N,N,N,N,N,N,N,N,N,N,N,N,N,Y,N
Moro,Black 1971: 2,"k, ɡ, l","k̠, ɡ̠, l̠ (backed)",_ back V,N,N,N,N,N,N,N,N,N,N,N,N,N,N,N,N,N,N,N,N,N,N,N,N,N,N,N,N,N,N,N,N,N,Y,Y,N
Moro,Black 1971: 2,"k, ɡ","k̟, ɡ̟ (fronted)",_ front V,N,N,N,N,N,N,N,N,N,N,N,N,N,N,N,N,N,N,N,N,N,N,N,N,N,N,N,N,N,N,N,N,N,Y,Y,N
Moro,Black 1971: 3-4,"f, s","v, z",freely,N,N,N,N,N,N,N,N,N,N,N,N,N,N,N,N,N,Y,N,N,N,N,N,N,N,N,N,N,N,N,N,N,N,N,N,N
Moro,Black 1971: 4,s,ʒ,freely,N,Y,N,N,N,N,N,N,N,N,N,N,N,N,N,N,N,Y,N,N,N,N,N,N,N,N,N,N,N,N,N,N,N,N,N,N
Moro,Black 1971: 5,"m, n̠, ŋ","m~m̥, n̠~n̠̥, ŋ~ŋ̥",utterance-finally,N,N,N,N,N,N,N,N,N,N,N,N,N,N,N,N,N,N,Y,N,N,N,N,N,N,N,N,N,N,N,N,N,N,N,N,Y
Moro,Black 1971: 5,n,n̠,_ ɖ,N,N,N,N,N,N,N,N,N,N,N,N,N,N,N,N,N,N,N,N,N,N,N,N,N,N,N,N,N,N,N,N,N,N,N,Y
Moro,Black 1971: 6,l,ɬ~ɮ,_ #,N,N,N,N,N,N,N,N,N,N,N,N,N,N,N,N,N,Y,N,N,N,N,N,N,N,N,N,N,N,N,N,N,N,N,N,N
Moro,Black 1971: 8,"p, b, t̪, d̪, ʈ, ɖ, k, ɡ, tʃ, dʒ",nasalized (specific properties not described),_ (ə) nasal C,N,N,N,N,N,N,N,N,N,N,N,N,N,N,N,N,N,N,N,N,N,N,N,N,N,N,N,N,N,N,N,N,N,Y,Y,N
Mumuye,Shimizu 1983: 21-22,n,u,u _,N,N,N,N,N,N,N,N,N,N,N,N,N,N,N,N,N,N,N,N,N,N,N,N,N,N,N,N,N,N,N,N,N,N,N,Y
Mumuye,"Shimizu 1983: 3, 22",kp,kʷ,freely,N,N,N,N,N,N,Y,N,N,N,N,N,N,N,N,N,N,N,N,N,N,N,N,N,N,N,N,N,N,N,N,N,N,N,N,N
Mumuye,Shimizu 1983: 4,n,ŋ,_ #,N,N,N,N,N,N,N,N,N,N,N,N,N,N,N,N,N,N,N,N,N,N,N,Y,N,N,N,N,N,N,N,N,N,N,N,Y
Mumuye,Shimizu 1983: 4,n,ŋ,_ C; C _ (adjacent to a consonant),N,N,N,N,N,N,N,N,N,N,N,N,N,N,N,N,N,N,N,N,N,N,N,Y,N,N,N,N,N,N,N,N,N,N,N,Y
Mwera,Harries 1950: 10,"m̩, n̪̩, n̩, ɲ̩, ŋ̩ (syllabic nasals)","m, n̪, n, ɲ, ŋ",rapid speech,N,N,N,N,N,N,N,N,N,N,N,N,N,N,N,N,N,N,N,N,N,N,N,Y,N,N,N,N,N,N,N,N,N,N,N,N
Mwera,Harries 1950: 3-4,∅,w,/u; o/ _ V; V _ /u; o/,N,N,N,N,N,N,N,N,N,N,N,N,N,N,N,N,N,N,N,N,N,N,N,N,N,N,N,N,N,N,N,N,Y,N,N,N
Mwera,Harries 1950: 3-4,∅,j,i _ V; V _ i,N,N,N,N,N,N,N,N,N,N,N,N,N,N,N,N,N,N,N,N,N,N,N,N,N,N,N,N,N,N,N,Y,N,N,N,N
Mwera,Harries 1950: 7,"t̪, d̪","t, d",_ /i; j/,N,N,N,N,N,N,N,N,N,N,N,N,N,N,N,N,N,N,N,N,N,Y,Y,N,N,N,N,N,N,N,N,N,N,Y,Y,N
Mwera,Harries 1950: 8,"k, ɡ","tʃ, dʒ",_ /e; i/,N,Y,N,N,N,N,N,N,N,N,N,N,N,N,N,N,N,Y,N,N,N,N,N,N,Y,N,N,N,N,N,N,N,N,Y,Y,N
Mwera,Harries 1950: 9-10,N (homorganic nasal),m; n̪; n; ɲ; ŋ (nasal C at place of C2),_ C2,N,N,N,N,N,N,N,N,N,N,N,N,N,N,N,N,N,N,N,N,N,N,N,Y,N,N,N,N,N,N,N,N,N,N,N,Y
Nakanai,Johnston 1980: 249,t,ts,_ i,N,N,N,N,N,N,N,N,N,N,N,N,N,N,N,N,N,N,N,N,N,N,N,N,N,N,N,N,N,N,N,N,N,Y,N,N
Ngäbere,Lininger Ross 1981: 106,"b, d, dʒ, ɡ","β, ð, ʒ, ɣ",V _ V,N,N,N,N,N,N,N,N,N,N,N,N,N,N,N,N,N,Y,N,N,N,N,N,N,N,N,N,N,N,N,N,N,N,N,Y,N
Ngäbere,Lininger Ross 1981: 106,∅,m; ŋ (N at place of following C),nasalized V _ /labial nasal; velar nasal; labial stop; velar stop/,N,N,N,N,N,N,N,N,N,N,N,N,N,N,N,N,N,N,N,N,N,N,N,Y,N,N,N,N,N,N,N,N,N,N,N,N
Ngäbere,Lininger Ross 1981: 106,∅,n~ŋ,nasalized V _ #,N,N,N,N,N,N,N,N,N,N,N,N,N,N,N,N,N,N,N,N,N,N,N,Y,N,N,N,N,N,N,N,N,N,N,N,N
Ngäbere,Lininger Ross 1981: 107,ɡʷ,w,V _ V,N,N,N,N,N,N,N,N,N,N,N,N,N,N,N,N,N,N,N,N,N,N,N,N,N,N,N,N,N,N,N,N,Y,N,N,N
Ngambay,Vandame 1963: 12,i ,j,V _,N,N,N,N,N,N,N,N,N,N,N,N,N,N,N,N,N,N,N,N,N,N,N,N,N,N,N,N,N,N,N,Y,N,N,N,N
Ngambay,"Vandame 1963: 12, 16, 18",u,w,_ V,N,N,N,N,N,N,N,N,N,N,N,N,N,N,N,N,N,N,N,N,N,N,N,N,N,N,N,N,N,N,N,N,Y,N,N,N
Ngambay,Vandame 1963: 5,b,o,_ #,N,N,N,N,N,N,N,N,N,N,N,N,N,N,N,N,N,N,N,N,N,N,N,N,N,N,N,N,N,N,N,N,N,N,Y,N
Ngambay,Vandame 1963: 5,"ɓ, ɗ","m, n",nasal segment _,N,N,N,N,N,N,N,N,N,N,N,N,N,N,N,N,N,N,N,N,N,N,N,Y,N,N,N,N,N,N,N,N,N,N,N,N
Ngambay,"Vandame 1963: 6, 8","t, k","d, ɡ",V _,N,N,N,N,N,N,N,N,N,N,N,N,N,N,N,N,N,N,N,N,N,N,Y,N,N,N,N,N,N,N,N,N,N,Y,N,N
Ngambay,Vandame 1963: 7,dʒ,ʝ~j,V _ V,N,N,N,N,N,N,N,N,N,N,N,N,N,N,N,N,N,Y,N,N,N,N,N,N,N,N,N,N,N,N,N,Y,N,N,N,N
Ngambay,Vandame 1963: 7,ɗ,r~l,initially,N,N,N,N,N,N,N,N,N,N,N,N,N,N,N,N,N,N,N,N,N,N,N,N,N,N,N,N,N,Y,Y,N,N,N,N,N
Ngambay,Vandame 1963: 8,"k, ɡ","c, ɟ",_ i,N,N,N,N,N,N,N,N,N,N,N,N,N,N,N,N,N,N,N,N,N,N,N,N,N,N,N,N,N,N,N,N,N,Y,Y,N
Ngambay,Vandame 1963: 9,n,ɾ̃,V _ V,N,N,N,N,N,N,N,N,N,N,N,N,N,N,N,N,N,N,N,N,N,N,N,N,N,N,N,N,N,N,N,N,N,N,N,Y
Nimboran,Anceaux 1965: 18,"t̪, d̪, n̪, s̪",t d n s (lamino-alveolar),_ i,N,N,N,N,N,N,N,N,N,N,N,N,N,N,N,N,N,N,N,N,N,N,N,N,N,N,N,N,N,N,N,N,N,Y,Y,Y
Nimboran,Anceaux 1965: 19,"k, ɡ, ŋ","k̟, ɡ̟, ŋ̟ (fronted)",_ /i; e/; /i/ _,N,N,N,N,N,N,N,N,N,N,N,N,N,N,N,N,N,N,N,N,N,N,N,N,N,N,N,N,N,N,N,N,N,Y,Y,Y
Nimboran,Anceaux 1965: 23,ŋ,ŋ (slightly fronted),_ /k̟; ɡ̟/,N,N,N,N,N,N,N,N,N,N,N,N,N,N,N,N,N,N,N,N,N,N,N,N,N,N,N,N,N,N,N,N,N,N,N,Y
Nimboran,Anceaux 1965: 25,h,n̥; ŋ̥ (syllabic nasal C at place of following C),# _ /n; ŋ/,N,N,N,N,N,N,N,N,N,N,N,N,N,N,N,N,N,N,Y,N,N,N,N,N,N,N,N,N,N,N,N,N,N,N,N,N
Ningil,Manning and Saggers 1977: 57,ɸ,pʰ,non-finally (word-initially and medially),N,N,N,N,N,N,N,N,N,N,N,N,N,N,N,N,N,N,N,N,Y,Y,N,N,N,N,N,N,N,N,N,N,N,N,N,N
Ningil,Manning and Saggers 1977: 58,"p, t, k","b, d, ɡ",# _,N,N,N,N,N,N,N,N,N,N,N,N,N,N,N,N,N,N,N,N,N,N,Y,N,N,N,N,N,N,N,N,N,N,Y,N,N
Ningil,Manning and Saggers 1977: 58,"p, t, k","b, d, ɡ","word-medially, especially N _",N,N,N,N,N,N,N,N,N,N,N,N,N,N,N,N,N,N,N,N,N,N,Y,N,N,N,N,N,N,N,N,N,N,Y,N,N
Ningil,Manning and Saggers 1977: 58,"t, k","tʰ, kʰ",non-finally (word-initially and medially),N,N,N,N,N,N,N,N,N,N,N,N,N,N,N,N,N,N,N,N,Y,N,N,N,N,N,N,N,N,N,N,N,N,Y,N,N
Norwegian,Vanvik 1972:  156,"t, d, n, l","ʈ, ɖ, ɳ, ɭ",/ʈ; ɖ; ɳ; ɭ/ _,N,N,Y,N,N,N,N,N,N,N,N,N,N,N,N,N,N,N,N,N,N,N,N,N,N,N,N,N,N,N,N,N,N,Y,Y,Y
Norwegian,Vanvik 1972: 135-139,"p, t, k, ʈ","pʰ, tʰ, kʰ, ʈʰ",$ _ in stressed syllable,N,N,N,N,N,N,N,N,N,N,N,N,N,N,N,N,N,N,N,N,Y,N,N,N,N,N,N,N,N,N,N,N,N,Y,N,N
Norwegian,Vanvik 1972: 135-139,"p, t, k, ʈ","pʰ, tʰ, kʰ, ʈʰ",immediately preceding a pause,N,N,N,N,N,N,N,N,N,N,N,N,N,N,N,N,N,N,N,N,Y,N,N,N,N,N,N,N,N,N,N,N,N,Y,N,N
Norwegian,"Vanvik 1972: 137, 156","ɽ#t, ɽ#d, ɽ#n, ɽ#l","ʈ, ɖ, ɳ, ɭ",(all),N,N,Y,N,N,N,N,N,N,N,N,N,N,N,N,N,N,N,N,N,N,N,N,N,N,N,N,N,N,N,N,N,N,Y,Y,Y
Norwegian,"Vanvik 1972: 139-141, 156","m, n",ɱ,_ labiodental C,Y,N,N,N,N,N,N,N,N,N,N,N,N,N,N,N,N,N,N,N,N,N,N,N,N,N,N,N,N,N,N,N,N,N,N,Y
Norwegian,"Vanvik 1972: 139-141, 156",n,n̠,_ ʃ,N,N,N,N,N,N,N,N,N,N,N,N,N,N,N,N,N,N,N,N,N,N,N,N,N,N,N,N,N,N,N,N,N,N,N,Y
Norwegian,Vanvik 1972: 141-142,l,ɭ~ɽ,younger speakers,N,N,Y,N,N,N,N,N,N,N,N,N,N,N,N,N,N,N,N,N,N,N,N,N,N,N,N,N,N,N,N,N,N,N,N,N
Norwegian,Vanvik 1972: 144,s,ʃ,# _ /p; t; k; m; n; v; l/,N,Y,N,N,N,N,N,N,N,N,N,N,N,N,N,N,N,N,N,N,N,N,N,N,N,N,N,N,N,N,N,N,N,N,N,N
Norwegian,Vanvik 1972: 145,h,ɦ,voiced segment _ voiced segment,N,N,N,N,N,N,N,N,N,N,N,N,N,N,N,Y,N,N,N,N,N,N,N,N,N,N,N,N,N,N,N,N,N,N,N,N
Norwegian,Vanvik 1972: 157,"t, d, n, l","t̠, d̠, n̠, l̠ (post-alveolar)",ʃ _,N,Y,N,N,N,N,N,N,N,N,N,N,N,N,N,N,N,N,N,N,N,N,N,N,N,N,N,N,N,N,N,N,N,Y,Y,Y
Norwegian,Vanvik 1972: 157-158,"ʈ, ɖ, ɳ, ɭ","t̠, d̠, n̠, l̠ (post-alveolar)",_ ʃ,N,Y,N,N,N,N,N,N,N,N,N,N,N,N,N,N,N,N,N,N,N,N,N,N,N,N,N,N,N,N,N,N,N,N,N,N
Norwegian,Vanvik 1972: 158,s,ʃ,/ʈ; ɖ; ɳ; ɭ/ # _,N,Y,N,N,N,N,N,N,N,N,N,N,N,N,N,N,N,N,N,N,N,N,N,N,N,N,N,N,N,N,N,N,N,N,N,N
Oksapmin,Loughnane 2009: 34,"mb, nd, ŋɡ","m, n, ŋ",_ $,N,N,N,N,N,N,N,N,N,N,N,N,N,N,N,N,N,N,N,N,N,N,N,Y,N,N,N,N,N,N,N,N,N,N,N,N
Oksapmin,Loughnane 2009: 39-40,"t, k","tʰ, kʰ",_ #,N,N,N,N,N,N,N,N,N,N,N,N,N,N,N,N,N,N,N,N,Y,N,N,N,N,N,N,N,N,N,N,N,N,Y,N,N
Oksapmin,Loughnane 2009: 40-43,"ɸ, s, x","β, z, ɣ",voiced segment _ voiced segment,N,N,N,N,N,N,N,N,N,N,N,N,N,N,N,N,N,Y,N,N,N,N,N,N,N,N,N,N,N,N,N,N,N,N,N,N
Oksapmin,Loughnane 2009: 41,ɸ,p,_ $,N,N,N,N,N,N,N,N,N,N,N,N,N,N,N,N,N,N,N,N,N,Y,N,N,N,N,N,N,N,N,N,N,N,N,N,N
Palantla Chinantec,Merrifield 1963: 3,"k, ɡ, ŋ","kʲ, ɡʲ, ŋʲ",_ i,N,N,N,N,N,Y,N,N,N,N,N,N,N,N,N,N,N,N,N,N,N,N,N,N,N,N,N,N,N,N,N,N,N,Y,Y,Y
Palaung,Shorto 1960: 547,d,d̪,/t̪; n̪/ $ _,N,N,N,N,N,N,N,N,N,N,N,N,N,N,N,N,N,N,N,N,N,N,N,N,N,N,N,N,N,N,N,N,N,N,Y,N
Palaung,Shorto 1960: 547,j,j with friction,_ /high Vs; ə/,N,N,N,N,N,N,N,N,N,N,N,N,N,N,N,N,N,Y,N,N,N,N,N,N,N,N,N,N,N,N,N,N,N,N,N,N
Palula,Liljegren 2008: 61,"b, d, d̪, ɖ, ɡ","βʰ, zʰ, ðʰ, ʐʰ, ɣʰ",V _ V,N,N,N,N,N,N,N,N,N,N,N,N,N,N,N,N,N,Y,N,N,Y,N,N,N,N,N,N,N,N,N,N,N,N,N,Y,N
Palula,Liljegren 2008: 61,pʰ,f~ɸ,unspecified,Y,N,N,N,N,N,N,N,N,N,N,N,N,N,N,N,N,N,N,N,N,N,N,N,N,Y,N,N,N,N,N,N,N,N,N,N
Palula,Liljegren 2008: 61-62,"ɖʐ, ʥ, ts, ʈʂ","ʐ, ʝ, s, ʂ",freely,N,N,N,N,N,N,N,N,N,N,N,N,N,N,N,N,N,N,N,N,N,N,N,N,N,N,Y,N,N,N,N,N,N,N,N,N
Palula,Liljegren 2008: 62-63,n̪,ŋ,_ C,N,N,N,N,N,N,N,N,N,N,N,N,N,N,N,N,N,N,N,N,N,N,N,Y,N,N,N,N,N,N,N,N,N,N,N,Y
Palula,Liljegren 2008: 62-63,n̪,ɲ,_ C,N,N,N,N,N,N,N,N,N,N,N,N,N,N,N,N,N,N,N,N,N,N,N,N,N,N,N,N,N,N,N,N,N,N,N,Y
Palula,Liljegren 2008: 63,l,ɫ,back V _,N,N,N,N,N,N,N,N,Y,N,N,N,N,N,N,N,N,N,N,N,N,N,N,N,N,N,N,N,N,N,N,N,N,N,N,N
Pangasinan,Benton 1971: 18,d,ɾ,V _ V,N,N,N,N,N,N,N,N,N,N,N,N,N,N,N,N,N,N,N,N,N,N,N,N,N,N,N,N,N,Y,N,N,N,N,Y,N
Pangasinan,Benton 1971: 19-20,"t, k",ʔ,_ $ C,N,N,N,N,N,N,N,N,N,N,N,N,N,N,N,N,N,N,N,N,N,N,N,N,N,N,N,Y,N,N,N,N,N,Y,N,N
Pangasinan,Benton 1971: 20-21,k,x,V _ V,N,N,N,N,N,N,N,N,N,N,N,N,N,N,N,N,N,N,N,N,N,N,N,N,N,N,N,N,N,N,N,N,N,Y,N,N
Pangasinan,Benton 1971: 23-24,n,m; n; ŋ (nasal C at place of C2),_ C2,N,N,N,N,N,N,N,N,N,N,N,N,N,N,N,N,N,N,N,N,N,N,N,Y,N,N,N,N,N,N,N,N,N,N,N,Y
Pangasinan,Benton 1971: 9,"i, u","j, w",_ non-identical V,N,N,N,N,N,N,N,N,N,N,N,N,N,N,N,N,N,N,N,N,N,N,N,N,N,N,N,N,N,N,N,Y,Y,N,N,N
Pech,Holt 1999: 15-16,k,ɡ,V: _,N,N,N,N,N,N,N,N,N,N,N,N,N,N,N,N,N,N,N,N,N,N,Y,N,N,N,N,N,N,N,N,N,N,Y,N,N
Pech,Holt 1999: 16,b,β,V _ V,N,N,N,N,N,N,N,N,N,N,N,N,N,N,N,N,N,Y,N,N,N,N,N,N,N,N,N,N,N,N,N,N,N,N,Y,N
Pech,Holt 1999: 16,ʃ,tʃ,_ V,N,N,N,N,N,N,N,N,N,N,N,N,N,N,N,N,N,N,N,N,N,N,N,N,Y,N,N,N,N,N,N,N,N,N,N,N
Pech,Holt 1999: 17,r,r̥ (partially devoiced),_ voiceless C,N,N,N,N,N,N,N,N,N,N,N,N,N,N,N,N,N,N,Y,N,N,N,N,N,N,N,N,N,N,N,N,N,N,N,N,N
Pech,Holt 1999: 17,r,r̥ (partially devoiced),phrase-finally,N,N,N,N,N,N,N,N,N,N,N,N,N,N,N,N,N,N,Y,N,N,N,N,N,N,N,N,N,N,N,N,N,N,N,N,N
Pech,Holt 1999: 23-24,"t, k, w, perhaps others",∅,C _ C,N,N,N,N,N,N,N,N,N,N,N,N,N,N,N,N,N,N,N,N,N,N,N,N,N,N,N,N,N,N,N,N,N,Y,N,N
Pech,Holt 1999: 25,∅,s,r _ ʃ,N,N,N,N,N,N,N,N,N,N,N,N,N,N,N,N,N,N,N,N,N,N,N,N,N,N,Y,N,N,N,N,N,N,N,N,N
Pech,Holt 1999: 26,∅,w,u/k; h; ʔ/ _ V,N,N,N,N,N,N,N,N,N,N,N,N,N,N,N,N,N,N,N,N,N,N,N,N,N,N,N,N,N,N,N,N,Y,N,N,N
Pech,Holt 1999: 26,s,h,_ C,N,N,N,N,N,N,N,N,N,N,N,N,N,N,N,N,N,N,N,N,N,N,N,N,N,N,N,N,Y,N,N,N,N,N,N,N
Pech,Holt 1999: 26,∅,d,n _ r,N,N,N,N,N,N,N,N,N,N,N,N,N,N,N,N,N,N,N,N,N,N,Y,N,N,N,N,N,N,N,N,N,N,N,N,N
Rukai,Li 1973: 16,r,ʐ,in younger speakers,N,N,Y,N,N,N,N,N,N,N,N,N,N,N,N,N,N,Y,N,N,N,N,N,N,N,N,N,N,N,N,N,N,N,N,N,N
Rukai,Li 1973: 16,"ts, s","tsʲ, sʲ",_ i,N,N,N,N,N,Y,N,N,N,N,N,N,N,N,N,N,N,N,N,N,N,N,N,N,N,N,N,N,N,N,N,N,N,N,N,N
Rukai,Li 1973: 17,∅,w,u _ a,N,N,N,N,N,N,N,N,N,N,N,N,N,N,N,N,N,N,N,N,N,N,N,N,N,N,N,N,N,N,N,N,Y,N,N,N
Rukai,Li 1973: 17,∅,j,i _ a,N,N,N,N,N,N,N,N,N,N,N,N,N,N,N,N,N,N,N,N,N,N,N,N,N,N,N,N,N,N,N,Y,N,N,N,N
Sapuan,Jacq and Sidwell 1999: 6,∅,d,n _ r,N,N,N,N,N,N,N,N,N,N,N,N,N,N,N,N,N,N,N,N,N,N,Y,N,N,N,N,N,N,N,N,N,N,N,N,N
Sapuan,Jacq and Sidwell 1999: 8,r,ɭ,a _,N,N,Y,N,N,N,N,N,N,N,N,N,N,N,N,N,N,N,N,N,N,N,N,N,N,N,N,N,N,N,N,N,N,N,N,N
Sapuan,Jacq and Sidwell 1999: 9,"m, n",m; n (nasal C at place of C2),_ /labial C2; alveolar C2/,N,N,N,N,N,N,N,N,N,N,N,N,N,N,N,N,N,N,N,N,N,N,N,Y,N,N,N,N,N,N,N,N,N,N,N,Y
Sapuan,Jacq and Sidwell 1999: 9,"b, d, ɟ, ɡ","p, t, c, k",_ voiceless stop (where C1 is in a minorsyllable and following stop is in a mainsyllable),N,N,N,N,N,N,N,N,N,N,N,N,N,N,N,N,N,N,N,N,N,Y,N,N,N,N,N,N,N,N,N,N,N,N,Y,N
Sapuan,Jacq and Sidwell 1999: 9,"p, t, c, k","b, d, ɟ, ɡ",_ voiced stop (where C1 is in a minorsyllable and following stop is in a mainsyllable),N,N,N,N,N,N,N,N,N,N,N,N,N,N,N,N,N,N,N,N,N,N,Y,N,N,N,N,N,N,N,N,N,N,Y,N,N
Selepet,McElhanon 1970: 18,p,ɸ~f,# _ /i; u/,Y,N,N,N,N,N,N,N,N,N,N,N,N,N,N,N,N,N,N,N,N,N,N,N,N,Y,N,N,N,N,N,N,N,Y,N,N
Selepet,McElhanon 1970: 18,"p, t̪, k","pʰ, tʰ, kʰ",# _,N,N,N,N,N,N,N,N,N,N,N,N,N,N,N,N,N,N,N,N,Y,N,N,N,N,N,N,N,N,N,N,N,N,Y,N,N
Selepet,McElhanon 1970: 20,ŋ,ɲ,/t̪̪; n̪/ _,N,N,N,N,N,N,N,N,N,N,N,N,N,N,N,N,N,N,N,N,N,N,N,N,N,N,N,N,N,N,N,N,N,N,N,Y
Selepet,McElhanon 1970: 20,"b, d̪, ɡ","p, t̪, k",voiceless stop _,N,N,N,N,N,N,N,N,N,N,N,N,N,N,N,N,N,N,N,N,N,Y,N,N,N,N,N,N,N,N,N,N,N,N,Y,N
Selepet,McElhanon 1970: 20,"b, d̪, ɡ","mb, nd, ŋɡ",V _ V,N,N,N,N,N,N,N,N,N,Y,N,N,N,N,N,N,N,N,N,N,N,N,N,N,N,N,N,N,N,N,N,N,N,N,Y,N
Selepet,McElhanon 1970: 20,j,zʲ~sʲ,/oral stop; nasal/ _,N,N,N,N,N,Y,N,N,N,N,N,N,N,N,N,N,N,Y,N,N,N,N,N,N,N,N,N,N,N,N,N,N,N,N,N,N
Selepet,McElhanon 1970: 20,j,zʲ,# _ front V,N,N,N,N,N,Y,N,N,N,N,N,N,N,N,N,N,N,Y,N,N,N,N,N,N,N,N,N,N,N,N,N,N,N,N,N,N
Selepet,McElhanon 1970: 23,"p, b",w,V _ V,N,N,N,N,N,N,N,N,N,N,N,N,N,N,N,N,N,N,N,N,N,N,N,N,N,N,N,N,N,N,N,N,Y,Y,Y,N
Selepet,McElhanon 1970: 23,"t̪, d̪",r,V _ V,N,N,N,N,N,N,N,N,N,N,N,N,N,N,N,N,N,N,N,N,N,N,N,N,N,N,N,N,N,Y,N,N,N,Y,Y,N
Selepet,McElhanon 1970: 23,"k, ɡ",h,V _ V,N,N,N,N,N,N,N,N,N,N,N,N,N,N,N,N,N,N,N,N,N,N,N,N,N,N,N,N,Y,N,N,N,N,Y,Y,N
Selepet,McElhanon 1970: 23,t̪,∅,_ /s; l/,N,N,N,N,N,N,N,N,N,N,N,N,N,N,N,N,N,N,N,N,N,N,N,N,N,N,N,N,N,N,N,N,N,Y,N,N
Selepet,McElhanon 1970: 25,"p, t̪, k, m, n̪, ŋ ",∅,_ C2 (where C2 is identical C),N,N,N,N,N,N,N,N,N,N,N,N,N,N,N,N,N,N,N,N,N,N,N,N,N,N,N,N,N,N,N,N,N,Y,N,Y
Selepet,McElhanon 1970: 25,"m, n̪, ŋ",∅,_ stop,N,N,N,N,N,N,N,N,N,N,N,N,N,N,N,N,N,N,N,N,N,N,N,N,N,N,N,N,N,N,N,N,N,N,N,Y
Selepet,McElhanon 1970: 27-28,w,β,V _ V,N,N,N,N,N,N,N,N,N,N,N,N,N,N,N,N,N,Y,N,N,N,N,N,N,N,N,N,N,N,N,N,N,N,N,N,N
Sheko,Hellenthal 2010: 86,b,β,V _,N,N,N,N,N,N,N,N,N,N,N,N,N,N,N,N,N,Y,N,N,N,N,N,N,N,N,N,N,N,N,N,N,N,N,Y,N
Sheko,Hellenthal 2010: 86,f,p,_ /labial stop; labial nasal/; /labial stop; labial nasal/ _,N,N,N,N,N,N,N,N,N,N,N,N,N,N,N,N,N,N,N,N,N,Y,N,N,N,N,N,N,N,N,N,N,N,N,N,N
Sheko,Hellenthal 2010: 86,ʒ,ɟ~dʒ,(all),N,N,N,N,N,N,N,N,N,N,N,N,N,N,N,N,N,Y,N,N,N,N,N,N,N,N,N,N,N,N,N,N,N,N,N,N
Sheko,Hellenthal 2010: 87,h,ɦ,# _,N,N,N,N,N,N,N,N,N,N,N,N,N,N,N,Y,N,N,N,N,N,N,N,N,N,N,N,N,N,N,N,N,N,N,N,N
Sheko,Hellenthal 2010: 88-89,n̩,n,$ _; _ $,N,N,N,N,N,N,N,N,N,N,N,N,N,N,N,N,N,N,N,N,N,N,N,Y,N,N,N,N,N,N,N,N,N,N,N,N
Sheko,Hellenthal 2010: 89,uj,wi,freely,N,N,N,N,N,N,N,N,N,N,N,N,N,N,N,N,N,N,N,N,N,N,N,N,N,N,N,N,N,N,N,N,Y,N,N,N
Sheko,Hellenthal 2010: 89-90,n,m; ɳ; ɲ; ŋ (nasal C at place of C2),C2 _; _ C2 (adjacent to another C),N,N,N,N,N,N,N,N,N,N,N,N,N,N,N,N,N,N,N,N,N,N,N,Y,N,N,N,N,N,N,N,N,N,N,N,Y
Sheko,Hellenthal 2010: 91,"m, n, ɳ, ɲ, ŋ",∅,_ nasal C,N,N,N,N,N,N,N,N,N,N,N,N,N,N,N,N,N,N,N,N,N,N,N,N,N,N,N,N,N,N,N,N,N,N,N,Y
Sheko,Hellenthal 2010: 92,"ʂ, ʐ, tʂ, tʂ’","ʂʷ, ʐʷ, tʂʷ, tʂʷ’",freely,N,N,N,N,N,N,Y,N,N,N,N,N,N,N,N,N,N,N,N,N,N,N,N,N,N,N,N,N,N,N,N,N,N,N,N,N
Sheko,Hellenthal 2010: 94-95,"z, ʒ, ʐ","s, ʃ, ʂ",_ /p; t; k; ʔ/,N,N,N,N,N,N,N,N,N,N,N,N,N,N,N,N,N,N,N,N,N,N,N,N,N,N,Y,N,N,N,N,N,N,N,N,N
Sheko,Hellenthal 2010: 94-95,"z, ʒ, ʐ","s, ʃ, ʂ",_ # preceding pause,N,N,N,N,N,N,N,N,N,N,N,N,N,N,N,N,N,N,N,N,N,N,N,N,N,N,Y,N,N,N,N,N,N,N,N,N
Sheko,Hellenthal 2010: 95,"ts, tʃ, tʂ",t,_ syllabic N,N,N,N,N,N,N,N,N,N,N,N,N,N,N,N,N,N,N,N,N,N,Y,N,N,N,N,N,N,N,N,N,N,N,N,N,N
Sheko,Hellenthal 2010: 95-96,C,Cʲ,_ e,N,N,N,N,N,Y,N,N,N,N,N,N,N,N,N,N,N,N,N,N,N,N,N,N,N,N,N,N,N,N,N,N,N,Y,Y,Y
Sheko,Hellenthal 2010: 96,"b, k, ɡ","bʷ, kʷ, ɡʷ",_ o; u,N,N,N,N,N,N,Y,N,N,N,N,N,N,N,N,N,N,N,N,N,N,N,N,N,N,N,N,N,N,N,N,N,N,Y,Y,N
Sheko,Hellenthal 2010: 96-97,V,j; w; ∅,V _; _ V when there is a sequence of unlike vowels,N,N,N,N,N,N,N,N,N,N,N,N,N,N,N,N,N,N,N,N,N,N,N,N,N,N,N,N,N,N,N,Y,Y,N,N,N
Sheko,Hellenthal 2010: 97-98,∅,j; w,V1 _ V2 (between two unlike vowels),N,N,N,N,N,N,N,N,N,N,N,N,N,N,N,N,N,N,N,N,N,N,N,N,N,N,N,N,N,N,N,Y,Y,N,N,N
Sheko,Hellenthal 2010: 98,"p, t, k","m̥, n̥, ŋ̥",nasal C _ nasal C,N,N,N,N,N,N,N,N,N,N,N,N,N,N,N,N,N,N,Y,N,N,N,N,N,N,N,N,N,N,N,N,N,N,Y,N,N
Shuswap,"Kuipers 1974: 22, 34","k, k’, x, q, q’, χ, ʕ, ʕ’","kʷ, kʷ’, xʷ, qʷ, qʷ’, χʷ, ʕʷ, ʕʷ’",u _; _u (adjacent to /u/),N,N,N,N,N,N,Y,N,N,N,N,N,N,N,N,N,N,N,N,N,N,N,N,N,N,N,N,N,N,N,N,N,N,Y,N,N
Shuswap,Kuipers 1974: 24,"n, n’","ŋ, ŋ’",_ /k; k’/,N,N,N,N,N,N,N,N,N,N,N,N,N,N,N,N,N,N,N,N,N,N,N,Y,N,N,N,N,N,N,N,N,N,N,N,Y
Sinaugoro,Tauberschmidt 1999: 7,i ,j,$ _,N,N,N,N,N,N,N,N,N,N,N,N,N,N,N,N,N,N,N,N,N,N,N,N,N,N,N,N,N,N,N,Y,N,N,N,N
Slave,Rice 1989: 31,"kʰ, k, x, ɣ","cʰ, c, ç, ʝ",_ front V,N,N,N,N,N,N,N,N,N,N,N,N,N,N,N,N,N,N,N,N,N,N,N,N,N,N,N,N,N,N,N,N,N,Y,Y,N
Slave,Rice 1989: 31,"p’, t’, k’, kʷ’, ts’, tʃ’, tɬ’, tθ’","b, d, ɡ, ɡʷ, dz, dʒ, dl, dð",V _ V,N,N,N,N,N,N,N,N,N,N,N,N,N,N,N,N,N,Y,N,N,N,N,Y,N,N,N,N,N,N,N,N,N,N,N,N,N
Slave,Rice 1989: 31-32,"kʰ, k, x","kʷʰ, kʷ, xʷ",_ rounded V,N,N,N,N,N,N,Y,N,N,N,N,N,N,N,N,N,N,N,N,N,N,N,N,N,N,N,N,N,N,N,N,N,N,Y,Y,N
Slave,Rice 1989: 31-32,ɣ,ɣʷ~w,_ rounded V,N,N,N,N,N,N,Y,N,N,N,N,N,N,N,N,N,N,N,N,N,N,N,N,N,N,N,N,N,N,N,N,N,Y,N,N,N
Slave,Rice 1989: 32,x,h,freely,N,N,N,N,N,N,N,N,N,N,N,N,N,N,N,N,N,N,N,N,N,N,N,N,N,N,N,N,Y,N,N,N,N,N,N,N
Slave,Rice 1989: 33,ɣ,j,_ front V,N,N,N,N,N,N,N,N,N,N,N,N,N,N,N,N,N,N,N,N,N,N,N,N,N,N,N,N,N,N,N,Y,N,N,N,N
Slave,Rice 1989: 33,"tsʰ, ts’ (and perhaps others)","tʃʰ, tʃ’",_ palatoalveolar C,N,Y,N,N,N,N,N,N,N,N,N,N,N,N,N,N,N,N,N,N,N,N,N,N,Y,N,N,N,N,N,N,N,N,N,N,N
Slave,Rice 1989: 33,kʷ’,w’,some speakers,N,N,N,N,N,N,N,N,N,N,N,N,N,N,N,N,Y,N,N,N,N,N,N,N,N,N,N,N,N,N,N,N,N,N,N,N
Slave,Rice 1989: 34,"tʰ, t’","kʰ, k’",_ front V (optionally),N,N,N,N,N,N,N,N,N,N,N,N,N,N,N,N,N,N,N,N,N,Y,N,N,N,N,N,N,N,N,N,N,N,Y,N,N
Slave,Rice 1989: 34,l,n,freely,N,N,N,N,N,N,N,N,N,N,N,N,N,N,N,N,N,N,N,N,N,N,N,Y,N,N,N,N,N,N,N,N,N,N,N,N
Slave,Rice 1989: 34,kʷ,p~pʷ,p~pʷ is more innovative form,N,N,N,N,N,N,N,N,N,N,N,N,N,N,N,N,N,N,N,N,N,N,Y,N,N,N,N,N,N,N,N,N,N,N,N,N
Taiof,Ross 2002: 426,"ts, d, n, ŋ","tʃ, dʒ~dz, ɲ, ɲ",_ i,N,Y,N,N,N,N,N,N,N,N,N,N,N,N,N,N,N,Y,N,N,N,N,N,N,Y,N,N,N,N,N,N,N,N,N,Y,Y
Taiof,Ross 2002: 426,d,dz,_ /i; u/,N,N,N,N,N,N,N,N,N,N,N,N,N,N,N,N,N,Y,N,N,N,N,N,N,N,N,N,N,N,N,N,N,N,N,Y,N
Taiof,Ross 2002: 426-427,ɲ,ŋ,i _ #,N,N,N,N,N,N,N,N,N,N,N,N,N,N,N,N,N,N,N,N,N,N,N,Y,N,N,N,N,N,N,N,N,N,N,N,N
Taiof,Ross 2002: 427,∅,h,V _ #,N,N,N,N,N,N,N,N,N,N,N,N,N,N,N,N,N,N,N,N,N,N,N,N,N,N,N,N,Y,N,N,N,N,N,N,N
Temne,Wilson 1961: 5,ŋ,∅,_ nasal C,N,N,N,N,N,N,N,N,N,N,N,N,N,N,N,N,N,N,N,N,N,N,N,N,N,N,N,N,N,N,N,N,N,N,N,Y
Temne,Wilson 1961: 6,r,d,ŋ _,N,N,N,N,N,N,N,N,N,N,N,N,N,N,N,N,N,N,N,N,N,N,Y,N,N,N,N,N,N,N,N,N,N,N,N,N
Ternatean,Hayami-Allen 2001: 215-217,j,h,V_V; (and #_ historically),N,N,N,N,N,N,N,N,N,N,N,N,N,N,N,N,N,N,N,N,N,N,N,N,N,N,N,N,Y,N,N,N,N,N,N,N
Ternatean,"Hayami-Allen 2001: 35, 37-38",∅,ʔ,V _ /stressed V; V#/,N,N,N,N,N,N,N,N,N,N,N,N,N,N,N,N,N,N,N,N,N,N,N,N,N,N,N,Y,N,N,N,N,N,N,N,N
Ternatean,Hayami-Allen 2001: 40,m,b,ɡ _,N,N,N,N,N,N,N,N,N,N,N,N,N,N,N,N,N,N,N,N,N,N,Y,N,N,N,N,N,N,N,N,N,N,N,N,Y
Tigak,Beaumont 1979: 14,i ,j,_ V,N,N,N,N,N,N,N,N,N,N,N,N,N,N,N,N,N,N,N,N,N,N,N,N,N,N,N,N,N,N,N,Y,N,N,N,N
Tigre,Raz 1983: 5,"b, d, ɡ","b̥, d̥, g̥",_ $,N,N,N,N,N,N,N,N,N,N,N,N,N,N,N,N,N,N,N,N,N,N,N,N,N,N,N,N,N,N,N,N,N,N,Y,N
Tigre,Raz 1983: 5,k’,ʔ,_ ##C,N,N,N,N,N,N,N,N,N,N,N,N,N,N,N,N,N,N,N,N,N,N,N,N,N,N,N,Y,N,N,N,N,N,N,N,N
Tigre,Raz 1983: 5,"k’, t’, ts’, tʃ’","k, t, ts, tʃ",_ C $ C,N,N,N,N,N,N,N,N,N,N,N,N,N,N,N,N,N,N,N,N,N,Y,N,N,Y,N,N,N,N,N,N,N,N,N,N,N
Tigre,Raz 1983: 5,k’,k,_ #,N,N,N,N,N,N,N,N,N,N,N,N,N,N,N,N,N,N,N,N,N,Y,N,N,N,N,N,N,N,N,N,N,N,N,N,N
Tinrin,Osumi 1995: 17,b,bˠ,_ /u; ɯ/ ,N,N,N,N,N,N,N,N,Y,N,N,N,N,N,N,N,N,N,N,N,N,N,N,N,N,N,N,N,N,N,N,N,N,N,Y,N
Tinrin,Osumi 1995: 17,p,pˠ,_ /u; ũ/,N,N,N,N,N,N,N,N,Y,N,N,N,N,N,N,N,N,N,N,N,N,N,N,N,N,N,N,N,N,N,N,N,N,Y,N,N
Tinrin,Osumi 1995: 17-18,"ʈ, ɖ","ʈʲ~tʃ, ɖʲ~dʒ",_ i,N,Y,N,N,N,Y,N,N,N,N,N,N,N,N,N,N,N,N,N,N,N,N,N,N,Y,N,N,N,N,N,N,N,N,N,N,N
Tinrin,Osumi 1995: 19,j,j with friction,_ i,N,N,N,N,N,N,N,N,N,N,N,N,N,N,N,N,N,Y,N,N,N,N,N,N,N,N,N,N,N,N,N,N,N,N,N,N
Tinrin,Osumi 1995: 19,ʂ,ʃ,_ i,N,Y,N,N,N,N,N,N,N,N,N,N,N,N,N,N,N,N,N,N,N,N,N,N,N,N,N,N,N,N,N,N,N,N,N,N
Tinrin,Osumi 1995: 21,ɲ,j,nasal V _,N,N,N,N,N,N,N,N,N,N,N,N,N,N,N,N,N,N,N,N,N,N,N,N,N,N,N,N,N,N,N,Y,N,N,N,N
Tohono O'odham,Hale 1959: 12,"b, d, dʒ, ɡ","p, t, tʃ, k",# _; _stressed V; stressed V_ ; _ C; _ voiceless V,N,N,N,N,N,N,N,N,N,N,N,N,N,N,N,N,N,N,N,N,N,Y,N,N,Y,N,N,N,N,N,N,N,N,N,Y,N
Tohono O'odham,Hale 1959: 13-14,ɖ ,ʰʈ,_ voiceless fricative,N,N,N,N,N,N,N,N,N,N,N,N,N,N,N,N,N,N,N,Y,N,N,N,N,N,N,N,N,N,N,N,N,N,N,N,N
Tohono O'odham,Hale 1959: 13-14,ɖ ,ʰʈ,unstressed V _ voiceless V,N,N,N,N,N,N,N,N,N,N,N,N,N,N,N,N,N,N,N,Y,N,N,N,N,N,N,N,N,N,N,N,N,N,N,N,N
Tohono O'odham,Hale 1959: 15,"m, n, ɲ, l, w","m̥, n̥, ɲ̥, l̥, w̥",_ voiceless segment,N,N,N,N,N,N,N,N,N,N,N,N,N,N,N,N,N,N,Y,N,N,N,N,N,N,N,N,N,N,N,N,N,N,N,N,Y
Tojolabal,Furbee-Losee 1976: 189-190,ts,s,s _,N,N,N,N,N,N,N,N,N,N,N,N,N,N,N,N,N,N,N,N,N,N,N,N,N,N,Y,N,N,N,N,N,N,N,N,N
Tojolabal,Furbee-Losee 1976: 192,b’,s,_ s,N,N,N,N,N,N,N,N,N,N,N,N,N,N,N,N,N,N,N,N,N,N,N,N,N,N,Y,N,N,N,N,N,N,N,N,N
Tojolabal,Furbee-Losee 1976: 193-194,lh,r,(all),N,N,N,N,N,N,N,N,N,N,N,N,N,N,N,N,N,N,N,N,N,N,N,N,N,N,N,N,N,Y,N,N,N,N,N,N
Tojolabal,Furbee-Losee 1976: 194,r,ɣ,V _ V,N,N,N,N,N,N,N,N,N,N,N,N,N,N,N,N,N,Y,N,N,N,N,N,N,N,N,N,N,N,N,N,N,N,N,N,N
Tojolabal,Furbee-Losee 1976: 194,r,ɣ,voiced non-continuant _ V,N,N,N,N,N,N,N,N,N,N,N,N,N,N,N,N,N,Y,N,N,N,N,N,N,N,N,N,N,N,N,N,N,N,N,N,N
Tojolabal,Furbee-Losee 1976: 195,ɡ,ɣ,V _ V,N,N,N,N,N,N,N,N,N,N,N,N,N,N,N,N,N,Y,N,N,N,N,N,N,N,N,N,N,N,N,N,N,N,N,Y,N
Tojolabal,Furbee-Losee 1976: 195,ɓ,ɓʲ,_ /iw; ij; iʃ/,N,N,N,N,N,Y,N,N,N,N,N,N,N,N,N,N,N,N,N,N,N,N,N,N,N,N,N,N,N,N,N,N,N,N,N,N
Tondano,Sneddon 1975: 15,k,k̟ (fronted),_ /i; e/; /i; e/_# ,N,N,N,N,N,N,N,N,N,N,N,N,N,N,N,N,N,N,N,N,N,N,N,N,N,N,N,N,N,N,N,N,N,Y,N,N
Tondano,Sneddon 1975: 16,n,n̪,_ t,N,N,N,N,N,N,N,N,N,N,N,N,N,N,N,N,N,N,N,N,N,N,N,N,N,N,N,N,N,N,N,N,N,N,N,Y
Tondano,Sneddon 1975: 16,n,ɲ̞ (without complete closure),V (#) _ s,N,N,N,N,N,N,N,N,N,N,N,N,N,N,N,N,N,N,N,N,N,N,N,N,N,N,N,N,N,N,N,N,N,N,N,Y
Tondano,Sneddon 1975: 17,β,w,o _ #,N,N,N,N,N,N,N,N,N,N,N,N,N,N,N,N,N,N,N,N,N,N,N,N,N,N,N,N,N,N,N,N,Y,N,N,N
Tondano,Sneddon 1975: 17,β,v,_ i,Y,N,N,N,N,N,N,N,N,N,N,N,N,N,N,N,N,N,N,N,N,N,N,N,N,N,N,N,N,N,N,N,N,N,N,N
Tondano,Sneddon 1975: 30,"ŋ, n, m",∅,_ ɡ d b,N,N,N,N,N,N,N,N,N,N,N,N,N,N,N,N,N,N,N,N,N,N,N,N,N,N,N,N,N,N,N,N,N,N,N,Y
Toqabaqita,Lichtenberk 2008: 7,"ɸ, θ","β, ð",V _ V,N,N,N,N,N,N,N,N,N,N,N,N,N,N,N,N,N,Y,N,N,N,N,N,N,N,N,N,N,N,N,N,N,N,N,N,N
Touareg,Prasse 1985: 7,"m, n, ɲ, ŋ",m; n; ɲ; ŋ; ɴ (nasal C at place of C2),_ C2,N,N,N,Y,N,N,N,N,N,N,N,N,N,N,N,N,N,N,N,N,N,N,N,Y,N,N,N,N,N,N,N,N,N,N,N,Y
Touareg,Prasse 1985: 7,∅,ʔ,# _ V,N,N,N,N,N,N,N,N,N,N,N,N,N,N,N,N,N,N,N,N,N,N,N,N,N,N,N,Y,N,N,N,N,N,N,N,N
Trukese,Dyen 1965: 2,"p, t, ʈʂ, k","b, d, ɖʐ, ɡ",_ /nasals; r; w/,N,N,N,N,N,N,N,N,N,N,N,N,N,N,N,N,N,Y,N,N,N,N,Y,N,N,N,N,N,N,N,N,N,N,Y,N,N
Trukese,Dyen 1965: 7,"k, ŋ",k; ŋ (totally assimilates to C2),_ # /k; ŋ/,N,N,N,N,N,N,N,N,N,N,N,N,N,N,N,N,N,N,N,N,N,Y,N,Y,N,N,N,N,N,N,N,N,N,Y,N,Y
Trukese,Dyen 1965: 7,n,t; s; r (assimilates completely to adjacent C),C # _; _ # C (preceding/following word-marginal alveolar C),N,N,N,N,N,N,N,N,N,N,N,N,N,N,N,N,N,N,N,N,N,Y,N,N,N,N,Y,N,N,Y,N,N,N,N,N,Y
Trukese,Dyen 1965: 7,"t, ʈʂ",s; t; ʈʂ (total assimilation to following C),_ /s; t; ʈʂ/ (where C2 is a following apical consonant other than /n/),N,N,Y,N,N,N,N,N,N,N,N,N,N,N,N,N,N,N,N,N,N,Y,N,N,N,N,Y,N,N,N,N,N,N,Y,N,N
Trukese,Dyen 1965: 7-8,"pˠ, p, m, f",pˠ; p; m; f (assimilates totally to C2),_ # /pˠ; p; m; f/,Y,N,N,N,N,N,N,N,N,N,N,N,N,N,N,N,N,N,N,N,N,Y,N,Y,N,N,N,N,N,N,N,N,N,Y,N,Y
Trukese,Goodenough and Sugita 1980: xv,"m, mˠ, n, ŋ",denasalized flaps,V _ V,N,N,N,N,N,N,N,N,N,N,N,N,N,N,N,N,N,N,N,N,N,N,N,N,N,N,N,N,N,N,N,N,N,N,N,Y
Trukese,Goodenough and Sugita 1980: xv-xvii,"k, mˠ, pˠ, β̞","kʷ, mˠʷ, pˠʷ, w",/o; u/ _; _ /o; u/ (adjacent to /o; u/),N,N,N,N,N,N,Y,N,N,N,N,N,N,N,N,N,N,N,N,N,N,N,N,N,N,N,N,N,N,N,N,N,Y,Y,N,N
Trukese,Goodenough and Sugita 1980: xvi,"p, k, t, pˠ, ʈʂ","b, ɡ, d, bˠ, ɖʐ",V _ V,N,N,N,N,N,N,N,N,N,N,N,N,N,N,N,N,N,Y,N,N,N,N,Y,N,N,N,N,N,N,N,N,N,N,Y,N,N
Trukese,Goodenough and Sugita 1980: xvi,r,r̥,before or after a pause,N,N,N,N,N,N,N,N,N,N,N,N,N,N,N,N,N,N,Y,N,N,N,N,N,N,N,N,N,N,N,N,N,N,N,N,N
Trumai,Guirardello 1999: 2,n,n̪; ŋ (nasal C at place of C2),_ /t̪; k/,N,N,N,N,N,N,N,N,N,N,N,N,N,N,N,N,N,N,N,N,N,N,N,Y,N,N,N,N,N,N,N,N,N,N,N,Y
Trumai,Guirardello 1999: 2,"p, d, k","ɓ, ɗ, ɠ",_ # in monosyllabic words,N,N,N,N,N,N,N,N,N,N,N,N,N,Y,N,N,N,N,N,N,N,N,N,N,N,N,N,N,N,N,N,N,N,Y,Y,N
Trumai,Guirardello 1999: 2-3,x,ɣ (slightly voiced),V _ V,N,N,N,N,N,N,N,N,N,N,N,N,N,N,N,N,N,Y,N,N,N,N,N,N,N,N,N,N,N,N,N,N,N,N,N,N
Tucano,West and Welch 1967: 14,"p, t, k","pʰ, t,ʰ kʰ (more pronounced aspiration)",_ /u; ɨ/,N,N,N,N,N,N,N,N,N,N,N,N,N,N,N,N,N,N,N,N,Y,N,N,N,N,N,N,N,N,N,N,N,N,Y,N,N
Tucano,West and Welch 1967: 14-15,"b, d","mb, nd",breath group initially,N,N,N,N,N,N,N,N,N,Y,N,N,N,N,N,N,N,N,N,N,N,N,N,N,N,N,N,N,N,N,N,N,N,N,Y,N
Tucano,West and Welch 1967: 14-15,"b, d, ɡ","mb, nd, ŋɡ",nasalized V _,N,N,N,N,N,N,N,N,N,Y,N,N,N,N,N,N,N,N,N,N,N,N,N,N,N,N,N,N,N,N,N,N,N,N,Y,N
Tucano,West and Welch 1967: 15,"p, t, k","mp, nt, ŋk",voiceless C /high pitch nasalized V/_,N,N,N,N,N,N,N,N,N,Y,N,N,N,N,N,N,N,N,N,N,N,N,N,N,N,N,N,N,N,N,N,N,N,Y,N,N
Tucano,West and Welch 1980: 15,"b, d, ɡ, r, w, j","m, n, ŋ, ɾ̃, w̃, j̃",_ nasal V,N,N,N,N,N,N,N,N,N,N,N,N,N,N,N,N,N,N,N,N,N,N,N,Y,N,N,N,N,N,N,N,N,N,N,Y,N
Uighur,Hahn 1991: 83,"b, d, ɡ","p, t, k",voiceless C _,N,N,N,N,N,N,N,N,N,N,N,N,N,N,N,N,N,N,N,N,N,Y,N,N,N,N,N,N,N,N,N,N,N,N,Y,N
Uighur,Hahn 1991: 84,"b, d, ɡ, ɢ, dʒ, z, ʒ","p, t, k, q, tʃ, s, ʃ",_ #,N,N,N,N,N,N,N,N,N,N,N,N,N,N,N,N,N,N,N,N,N,Y,N,N,Y,N,Y,N,N,N,N,N,N,N,Y,N
Uighur,Hahn 1991: 86,"ɡ, ɢ, b","ɣ, ʁ, β~ʋ",voiced continuant _,Y,N,N,N,N,N,N,N,N,N,N,N,N,N,N,N,N,Y,N,N,N,N,N,N,N,N,N,N,N,N,N,N,N,N,Y,N
Uighur,Hahn 1991: 87,"t, z, tʃ, ʃ",s,_ s,N,N,N,N,N,N,N,N,N,N,N,N,N,N,N,N,N,N,N,N,N,N,N,N,N,N,Y,N,N,N,N,N,N,Y,N,N
Uighur,Hahn 1991: 88,n,m; ŋ; ɴ (nasal C at place of C2),_ C,N,N,N,Y,N,N,N,N,N,N,N,N,N,N,N,N,N,N,N,N,N,N,N,Y,N,N,N,N,N,N,N,N,N,N,N,Y
Uighur,Hahn 1991: 88,ɡ,ŋ,ŋ _ /C; #/,N,N,N,N,N,N,N,N,N,N,N,N,N,N,N,N,N,N,N,N,N,N,N,Y,N,N,N,N,N,N,N,N,N,N,Y,N
Uighur,Hahn 1991: 89,"tʃ, dʒ, k, ɡ, q, ɢ","ʃ, ʒ, x, ɣ~x, χ, ʁ~χ",_ $,N,N,N,N,N,N,N,N,N,N,N,N,N,N,N,N,N,Y,N,N,N,N,N,N,N,N,N,N,N,N,N,N,N,Y,Y,N
Uighur,Hahn 1991: 89,"p, t, k, q","pʰ, tʰ, kʰ, qʰ",$ _ V,N,N,N,N,N,N,N,N,N,N,N,N,N,N,N,N,N,N,N,N,Y,N,N,N,N,N,N,N,N,N,N,N,N,Y,N,N
V’enen Taut,Fox 1979: 2,"p, m","pʷ, mʷ",_ /i; e/,N,N,N,N,N,N,Y,N,N,N,N,N,N,N,N,N,N,N,N,N,N,N,N,N,N,N,N,N,N,N,N,N,N,Y,N,Y
V’enen Taut,Fox 1979: 2-3,"p, t, k","pʰ, tʰ, kʰ",_ #,N,N,N,N,N,N,N,N,N,N,N,N,N,N,N,N,N,N,N,N,Y,N,N,N,N,N,N,N,N,N,N,N,N,Y,N,N
V’enen Taut,Fox 1979: 3,l,ɮ,medially contiguous to /n/,N,N,N,N,N,N,N,N,N,N,N,N,N,N,N,N,N,Y,N,N,N,N,N,N,N,N,N,N,N,N,N,N,N,N,N,N
Warembori,Donohue 1999: 5,"m, n",m; n; ŋ (nasal C at place of C2) ,_ stop,N,N,N,N,N,N,N,N,N,N,N,N,N,N,N,N,N,N,N,N,N,N,N,Y,N,N,N,N,N,N,N,N,N,N,N,Y
Warembori,Donohue 1999: 5,"b, d","β, r",V _ V,N,N,N,N,N,N,N,N,N,N,N,N,N,N,N,N,N,Y,N,N,N,N,N,N,N,N,N,N,N,Y,N,N,N,N,Y,N
Warembori,Donohue 1999: 5-6,k,ɡ,nasal C_,N,N,N,N,N,N,N,N,N,N,N,N,N,N,N,N,N,N,N,N,N,N,Y,N,N,N,N,N,N,N,N,N,N,Y,N,N
Warembori,Donohue 1999: 6,"n, m",∅,_ /n; m/ (preceding another nasal C),N,N,N,N,N,N,N,N,N,N,N,N,N,N,N,N,N,N,N,N,N,N,N,N,N,N,N,N,N,N,N,N,N,N,N,Y
Warembori,Donohue 1999: 7,"m, n","mː, nː",_ /b’; d’/ (preceding a heavy consonant),N,N,N,N,N,N,N,N,N,N,N,N,N,N,N,N,N,N,N,N,N,N,N,N,N,N,N,N,N,N,N,N,N,N,N,Y
Yagaria,Renck 1975: 13,m,b,ʔ _,N,N,N,N,N,N,N,N,N,N,N,N,N,N,N,N,N,N,N,N,N,N,Y,N,N,N,N,N,N,N,N,N,N,N,N,Y
Yagaria,Renck 1975: 13,ɡ,k,ʔ _,N,N,N,N,N,N,N,N,N,N,N,N,N,N,N,N,N,N,N,N,N,Y,N,N,N,N,N,N,N,N,N,N,N,N,Y,N
Yagaria,Renck 1975: 7,"b, d","ʔb, ʔd",V _ V,N,N,N,N,N,N,N,N,N,N,N,N,N,N,N,N,N,N,N,N,N,N,N,N,N,N,N,N,N,N,N,N,N,N,Y,N
Yagaria,Renck 1975: 8,ɡ,k,# _,N,N,N,N,N,N,N,N,N,N,N,N,N,N,N,N,N,N,N,N,N,Y,N,N,N,N,N,N,N,N,N,N,N,N,Y,N
Yagaria,Renck 1975: 8,ɡ,ɣ,/a; o/ _ /a; o/,N,N,N,N,N,N,N,N,N,N,N,N,N,N,N,N,N,Y,N,N,N,N,N,N,N,N,N,N,N,N,N,N,N,N,Y,N
Yelî Dnye,Henderson 1995: 7,"p, t, k","b, r, ɡ",V _ V,N,N,N,N,N,N,N,N,N,N,N,N,N,N,N,N,N,N,N,N,N,N,Y,N,N,N,N,N,N,Y,N,N,N,Y,N,N
Yessan-Mayo,Foreman and Marten 1973: 101,∅,h~transitional ə,prenasalized stop _ β,N,N,N,N,N,N,N,N,N,N,N,N,N,N,N,N,N,N,N,N,N,N,N,N,N,N,N,N,Y,N,N,N,N,N,N,N
Yessan-Mayo,Foreman and Marten 1973: 101,∅,h~transitional ə,voiceless stop _ /voiceless stop; nasal; l/,N,N,N,N,N,N,N,N,N,N,N,N,N,N,N,N,N,N,N,N,N,N,N,N,N,N,N,N,Y,N,N,N,N,N,N,N
Yessan-Mayo,Foreman and Marten 1973: 101,∅,h~transitional ə,β _ /l; voiceless stop/,N,N,N,N,N,N,N,N,N,N,N,N,N,N,N,N,N,N,N,N,N,N,N,N,N,N,N,N,Y,N,N,N,N,N,N,N
Yessan-Mayo,Foreman and Marten 1973: 83,k,ɡ,medially,N,N,N,N,N,N,N,N,N,N,N,N,N,N,N,N,N,N,N,N,N,N,Y,N,N,N,N,N,N,N,N,N,N,Y,N,N
Yessan-Mayo,Foreman and Marten 1973: 83,k,q (“back velar”),_ʌ; ʌ_ (adjacent to /ʌ/),N,N,N,Y,N,N,N,N,N,N,N,N,N,N,N,N,N,N,N,N,N,N,N,N,N,N,N,N,N,N,N,N,N,Y,N,N
Yessan-Mayo,Foreman and Marten 1973: 83-84,"t, k","tʰ, kʰ",# _; _ # (word-marginally),N,N,N,N,N,N,N,N,N,N,N,N,N,N,N,N,N,N,N,N,Y,N,N,N,N,N,N,N,N,N,N,N,N,Y,N,N
Yessan-Mayo,Foreman and Marten 1973: 84-85,"mb, nd, ŋɡ","mpʰ, ntʰ, ŋkʰ",_ #,N,N,N,N,N,N,N,N,N,N,N,N,N,N,N,N,N,N,N,N,Y,N,N,N,N,N,N,N,N,N,N,N,N,N,N,N
Yessan-Mayo,Foreman and Marten 1973: 84-87,"mb, m, β","mbʷ, mʷ, βʷ",ɔ _; _ɔ (adjacent to /ɔ/),N,N,N,N,N,N,Y,N,N,N,N,N,N,N,N,N,N,N,N,N,N,N,N,N,N,N,N,N,N,N,N,N,N,N,N,Y
Yessan-Mayo,Foreman and Marten 1973: 88,ɾ,r~r̥,non-initially (word-medially and -finally),N,N,N,N,N,N,N,N,N,N,N,N,N,N,N,N,N,N,Y,N,N,N,N,N,N,N,N,N,N,N,N,N,N,N,N,N
Yimas,Foley 1991: 39,"m, n, ɲ, ŋ","m̩, n̩, ɲ̩, ŋ̩ (syllabic)",homorganic stop _ #; stop _ stop,N,N,N,N,N,N,N,N,N,N,N,N,N,N,N,N,N,N,N,N,N,N,N,N,N,N,N,N,N,N,N,N,N,N,N,Y
Yimas,Foley 1991: 39,p,b,_ u,N,N,N,N,N,N,N,N,N,N,N,N,N,N,N,N,N,N,N,N,N,N,Y,N,N,N,N,N,N,N,N,N,N,Y,N,N
Yimas,Foley 1991: 39,"p, t, k","b, d, ɡ",nasal C_,N,N,N,N,N,N,N,N,N,N,N,N,N,N,N,N,N,N,N,N,N,N,Y,N,N,N,N,N,N,N,N,N,N,Y,N,N
Yimas,Foley 1991: 39,"p, t, c, k","pʰ, tʰ, cʰ, kʰ",_ stressed V,N,N,N,N,N,N,N,N,N,N,N,N,N,N,N,N,N,N,N,N,Y,N,N,N,N,N,N,N,N,N,N,N,N,Y,N,N
Yimas,Foley 1991: 39,"p, t, c, k","pʰ, tʰ, cʰ, kʰ",# _,N,N,N,N,N,N,N,N,N,N,N,N,N,N,N,N,N,N,N,N,Y,N,N,N,N,N,N,N,N,N,N,N,N,Y,N,N
Yimas,Foley 1991: 39,p,β,_ w,N,N,N,N,N,N,N,N,N,N,N,N,N,N,N,N,N,Y,N,N,N,N,N,N,N,N,N,N,N,N,N,N,N,Y,N,N
Yimas,Foley 1991: 39,k,ɣ,V _ V (second vowel unstressed),N,N,N,N,N,N,N,N,N,N,N,N,N,N,N,N,N,Y,N,N,N,N,N,N,N,N,N,N,N,N,N,N,N,Y,N,N
Yimas,Foley 1991: 39,c,s,V _ V,N,N,N,N,N,N,N,N,N,N,N,N,N,N,N,N,N,N,N,N,N,N,N,N,N,N,Y,N,N,N,N,N,N,N,N,N
Yimas,Foley 1991: 51-52,"t, n","tʲ, ɲ",/i; j/ _,N,N,N,N,N,Y,N,N,N,N,N,N,N,N,N,N,N,N,N,N,N,N,N,N,N,N,N,N,N,N,N,N,N,Y,N,Y
Yimas,Foley 1991: 53,r,t,_ #,N,N,N,N,N,N,N,N,N,N,N,N,N,N,N,N,N,N,N,N,N,Y,N,N,N,N,N,N,N,N,N,N,N,N,N,N
Yimas,Foley 1991: 53,"r, ʎ",t,_ n,N,N,N,N,N,N,N,N,N,N,N,N,N,N,N,N,N,N,N,N,N,Y,N,N,N,N,N,N,N,N,N,N,N,N,N,N
Zuni,Newman 1965: 13,"p#ʔ, t#ʔ, k#ʔ, kʷ#ʔ, ts#ʔ, tʃ#ʔ","p’, t’, k’, kʷ’, ts’, tʃ’",(all),N,N,N,N,N,N,N,N,N,N,N,N,Y,N,N,N,N,N,N,N,N,N,N,N,N,N,N,N,N,N,N,N,N,Y,N,N
Zuni,Newman 1965: 13,k,c,_ /a; e; i/,N,N,N,N,N,N,N,N,N,N,N,N,N,N,N,N,N,N,N,N,N,N,N,N,N,N,N,N,N,N,N,N,N,Y,N,N
Zuni,Newman 1965: 14,"m, n, l, w, j","m̥, n̥, l̥, w̥, j̥",(voiceless C) _ /h; ʔ/,N,N,N,N,N,N,N,N,N,N,N,N,N,N,N,N,N,N,Y,N,N,N,N,N,N,N,N,N,N,N,N,N,N,N,N,Y
